# Supplementary material for: Tracing artificial trans fat in popular foods in Europe: a market basket investigation
Source: PubMed Central journal article supplement — BMJ Open. 2014 May 20;4(5):e005218. doi: 10.1136/bmjopen-2014-005218 (PMC4039824; doi:10.1136/bmjopen-2014-005218), 2014-05-20
Supplement: bmjopen-2014-005218.draft_revisions.pdf [file bmjopen-2014-005218.draft_revisions.pdf]

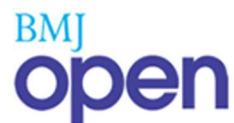

**Industrial trans fat in popular foods is still in 2013 a health issue in Europe: a market basket investigation.**

|                                 |                                                                                                                                                                                                                                                                       |
|---------------------------------|-----------------------------------------------------------------------------------------------------------------------------------------------------------------------------------------------------------------------------------------------------------------------|
| Journal:                        | <i>BMJ Open</i>                                                                                                                                                                                                                                                       |
| Manuscript ID:                  | bmjopen-2014-005218                                                                                                                                                                                                                                                   |
| Article Type:                   | Research                                                                                                                                                                                                                                                              |
| Date Submitted by the Author:   | 07-Mar-2014                                                                                                                                                                                                                                                           |
| Complete List of Authors:       | Stender, Steen; Copenhagen University Hospital Gentofte, Clinical Biochemistry<br>Astrup, Arne; Faculty of LifeSciences, University of Copenhagen, Nutrition, Excercise and Sports<br>Dyerberg, Jørn; Copenhagen University Hospital, Gentofte, Clinical Biochemistry |
| <b>Primary Subject Heading</b>: | Health policy                                                                                                                                                                                                                                                         |
| Secondary Subject Heading:      | Nutrition and metabolism                                                                                                                                                                                                                                              |
| Keywords:                       | Health policy < HEALTH SERVICES ADMINISTRATION & MANAGEMENT, NUTRITION & DIETETICS, Ischaemic heart disease < CARDIOLOGY                                                                                                                                              |
|                                 |                                                                                                                                                                                                                                                                       |

SCHOLARONE™  
Manuscripts

1  
2  
3  
4  
5  
6  
7  
8  
9  
10  
11  
12  
13  
14  
15  
16  
17  
18  
19  
20  
21  
22  
23  
24  
25  
26  
27  
28  
29  
30  
31  
32  
33  
34  
35  
36  
37  
38  
39  
40  
41  
42  
43  
44  
45  
46  
47  
48  
49  
50  
51  
52  
53  
54  
55  
56  
57  
58  
59  
60

**Industrial *trans* fat in popular foods is still a health issue in Europe: a market basket investigation**

Steen Stender, Arne Astrup, Jørn Dyerberg

Department of Clinical Biochemistry, Copenhagen University Hospital, Gentofte,

Niels Andersens Vej 65, DK-2900 Hellerup, Denmark Steen Stender professor Department of

Nutrition, Exercise and Sports, Faculty of Sciences, University of Copenhagen, Rolighedsvej 30,

DK-1958 Frederiksberg, Denmark Arne Astrup professor Department of Clinical Biochemistry,

Copenhagen University Hospital, Gentofte, Niels Andersens Vej 65, DK-2900 Hellerup, Denmark

Jørn Dyerberg professor

Correspondence to S Stender [steen.stender@regionh.dk](mailto:steen.stender@regionh.dk)

## Abstract

**Objective:** To minimise the intake of industrial *trans* fat (I-TF), nearly all European countries rely on food producers to voluntarily reduce the I-TF content in food. The objective of this study was to investigate the efficiency of this strategy in 2012-2013 in 20 European countries.

**Design:** The I-TF content in pre-packaged biscuits/cakes/wafers was assessed in a market basket investigation. Three large supermarkets were visited in each capital, and in some countries, three additional ethnic shops were included.

**Results:** A total of 598 samples of biscuits/cakes/wafers with “partially hydrogenated vegetable fat” or a similar term high on the list of ingredients were analysed, 312 products had more than 2 % of fat as I-TF, exceeding the legislatively determined I-TF limit in Austria and Denmark; the average was 19 %. In seven countries, no I-TF was found, whereas nine predominantly Eastern European countries had products with very high I-TF content. The products in the remaining four countries had intermediate levels. Of the five countries that were examined using the same procedure in 2006, three had unchanged I-TF levels in 2013, and two had lower levels. The 18 small ethnic shops examined in six Western European countries sold 83 products that contained an average of 23 % of the fat as I-TF, all imported from countries in South-eastern Europe. In Sweden, this type of imported food was also available in large supermarkets.

**Conclusion:** The findings suggest that subgroups of the population in many countries in Europe still consume I-TF in amounts that increase their risk of coronary heart disease. Under current EU legislation, the sale of products containing I-TF is legal but conflicts with the WHO recommendation to minimise the intake of I-TF. A EU-legislative limit on I-TF in foods is an effective strategy to achieve this goal.

## Article summary

### Strengths and limitations of this study

- A strength is the measurement of TF in many popular foods obtained in 3 large supermarkets in 20 different EU countries in 2012-13, and in popular foods obtained in 3 ethnic shops in Berlin, Paris, London, Malmö and Copenhagen
- In South-eastern Europe foods with high amounts of I-TF are present in large supermarkets and the same brands of foods with high amounts of I-TF are present also in ethnic shops in Western Europe
- Foods with high amounts of I-TF produced in some countries in Europe are legally exported to many other European countries
- A limitation is that the average daily intake of I-TF was not measured in subgroups of the population, but instead inferred from the presence of popular foods with high amounts of I-TF in large super markets and in small ethnic shops.

## Introduction

*Trans* fat (TF) in food originates from the industrial hydrogenation of oils and from ruminant sources. Compared to non-hydrogenated oils, fats containing industrial *trans* fat (I-TF) are solid at room temperature, have some technical advantages for food processing, and prolong the shelf life of products. I-TF can constitute up to 60% of the fat in certain foods, whereas ruminant fat contains 6% TF at most.<sup>1</sup> A meta-analysis of four large prospective studies found that an average intake of

1  
2  
3  
4 approximately five grams per day of TF, corresponding to 2% of the total energy intake, was  
5  
6 associated with a 23% increase in the risk of coronary heart disease.<sup>2</sup> More recently, TF intake has  
7  
8 also been associated with all-cause mortality in a large US-based study.<sup>3</sup> A 2013 review concluded  
9  
10 that “the detrimental effects of industrial *trans* fatty acids on heart health are beyond dispute”.<sup>4</sup>  
11  
12 Furthermore, inverse associations have been observed between TF and essential long-chain  
13  
14 polyunsaturated fatty acids in the blood lipids of pregnant women and their offspring at birth as well  
15  
16 as in human milk. Because the latter fatty acids are important for neurodevelopment in infancy, the  
17  
18 potential untoward effect of TF exposure caused by fatty acid competition in the brain has received  
19  
20 increased attention.<sup>5</sup>  
21  
22

23  
24 Based on the relationship between the intake of I-TF and heart disease, for years several public  
25  
26 health organisations have recommended that I-TF intake be lowered as much as possible.<sup>6-8</sup>  
27

28  
29 In 2003, Canada introduced mandatory labelling of the I-TF content in pre-packaged foods. In the  
30  
31 same year, Denmark introduced a legislative limit of 2% I-TF in the fat content of foods. The  
32  
33 European Commission initially opposed this legislation but dropped its infringement proceedings in  
34  
35 March 2007 because of increasing scientific evidence about the dangers of *trans* fat.<sup>9</sup> The US  
36  
37 introduced mandatory labelling of TF on pre-packaged foods in 2006, followed by legislative limits  
38  
39 on I-TF in the food served in restaurants in New York City in 2008 and in the state of California in  
40  
41 2010-11, and FDA has now proposed a legislative ban on industrial trans fat in 2014.<sup>10</sup> In Europe  
42  
43 in 2009, Austria and Switzerland introduced a legislative ban similar to the Danish ban, followed by  
44  
45 Iceland in 2011 and probably by Sweden, Hungary, and Norway in 2014.<sup>11-13</sup> However, in 2014,  
46  
47 only a minority of the population in the EU (i.e., less than 50 million of the 500 million people in  
48  
49 the EU) is protected by legislation against foods with high amounts of I-TF.  
50  
51

52  
53 The present study, examined the I-TF content in pre-packaged biscuits/cakes/wafers in 20 European  
54  
55 countries. The inclusion criteria for the food samples were precisely defined based on the list of  
56  
57  
58  
59  
60

1  
2  
3  
4 ingredients printed on the packing. The same procedure was used in similar studies in 2006 and  
5  
6 2009.<sup>14,15</sup> We further investigated whether products with high I-TF produced in some European  
7  
8 countries were disseminated to other European countries. The findings may be relevant to the future  
9  
10 regulation of the I-TF content in foods in the EU. “By 13 December 2014, the Commission, taking  
11  
12 into account scientific evidence and experience acquired in Member States, shall submit a report on  
13  
14 the presence of trans fats in foods and in the overall diet of the Union population. The aim of the  
15  
16 report shall be to assess the impact of appropriate means that could enable consumers to make  
17  
18 healthier food and overall dietary choices or that could promote the provision of healthier food  
19  
20 options to consumers including, among others, the provision of information on trans fat to  
21  
22 consumers or restrictions on their use. The Commission shall accompany this report with a  
23  
24 legislative proposal, if appropriate”.<sup>16</sup>  
25  
26  
27  
28  
29  
30

## 31 **Methods**

### 32 **Purchases in supermarkets**

33  
34  
35 The 20 countries visited encompass the countries in Ex-Yugoslavia, its neighbouring countries, three  
36  
37 Scandinavian, and three large countries in northern Europe: Germany, France, and UK.

38  
39  
40 The main tourist office in the capital of each country was asked to identify three large supermarkets,  
41  
42 preferably chain supermarkets with many large shops across the country. In several capitals, the  
43  
44 same stores visited in 2006 and in 2009 were visited in this study.<sup>14,15</sup> As in the previous studies,  
45  
46 packages of biscuits/cakes/wafers were obtained by systematically examining the labels of the  
47  
48 products placed on the appropriate shelves in the supermarkets. Packages were purchased only if  
49  
50 “partially hydrogenated fat” or a similar term was listed high on the list of ingredients and if the  
51  
52 label indicated that the fat content was equal to or exceeded 15 grams of fat per 100 grams of  
53  
54 product. In a few cases, the label also indicated the amount of TF per serving. If the same product  
55  
56  
57  
58  
59  
60

1  
2  
3  
4 appeared in packages of different sizes, only the smallest size was bought. If exactly the same  
5  
6 package was found in two different supermarkets in the same capital, only the one with the most  
7  
8 recent “best before date” was included in the study. The packages from the three supermarkets in  
9  
10 each capital were labelled and photographed, the package was opened, and two identical 50- to 100-  
11  
12 gram samples of the food were placed in appropriately labelled plastic bags. All of the empty  
13  
14 packages were stored, as were the receipts from the purchases. The name of the product, producer,  
15  
16 country of origin, “best before” date, and the languages used in the list of ingredients were  
17  
18 recorded.  
19  
20

21  
22 Between May 2012 and September 2013, 454 packages were purchased in 60 supermarkets in the  
23  
24 capitals of Albania, Austria, Bosnia-Herzegovina, Bulgaria, Croatia, Denmark, France, Germany,  
25  
26 Hungary, The Former Yugoslav republic of Macedonia, Montenegro, Poland, Norway, Romania,  
27  
28 Serbia, Slovakia, Sweden, the Czech Republic, and the United Kingdom. In addition, 30 packages  
29  
30 were bought in three large supermarkets in Malmö, the third largest city in Sweden.  
31  
32

### 33 **Purchases in ethnic shops**

34  
35 Because our analysis of the biscuits/cakes/wafers from supermarkets in the Balkan capitals yielded  
36  
37 a relatively high number of foods with high amounts of I-TF, we decided to search for these types  
38  
39 of Balkan foods in other countries using Google to identify ethnic shops selling Balkan foods.  
40  
41

42 Three different shops were visited in each of the capitals Berlin, Copenhagen, London, Oslo, and  
43  
44 Paris and in addition in Malmö. A total of 114 pre-packaged biscuits/cakes/wafers were purchased  
45  
46 in these shops using the same inclusion criteria that were used for the purchases in supermarkets.  
47  
48

49 The products were treated in the same manner as the samples from the supermarkets.  
50

### 51 **Analysis of TF**

52  
53 The foods were homogenised, and the fatty acid content was analysed using gas chromatography on  
54  
55 a 60-metre highly polar capillary column using a modification of the AOAC 006·06 method. The  
56  
57  
58  
59  
60

1  
2  
3  
4 analytical work was conducted by Microbac Laboratories, Warrendale, Pennsylvania, US, an ISO-  
5  
6 17025-certified laboratory.  
7  
8  
9

## 10 11 **Results**

12  
13 Figure 1 depicts the I-TF content in the 312 products bought in the three supermarkets in each  
14 country, ranked according to I-TF level expressed in grams per 100 grams of the product. Each bar  
15 in each panel represents a product. Only products with more than 2% of the fat content as TF are  
16 shown. The first number given in the panel is the number of products with more than 2% of the fat  
17 content as TF. The number in parentheses is the number of products that fulfilled the inclusion  
18 criteria. The difference between the two numbers reflects the number of samples that did not  
19 contain appreciable amounts of TF despite the information on the label. The panels are ranked  
20 according to the sum of I-TF concentrations in the different products. Bosnia Herzegovina appears  
21 to have the greatest sum, followed by Serbia. Of the 312 products made by 51 factories in 15  
22 European countries, 40% of the products had more than 20% of the fat as I-TF. In the supermarkets  
23 in the capitals of Austria, Denmark, France, Germany, Norway, Sweden, and the UK, no samples  
24 were found that fulfilled the inclusion criteria (figure 1, lower right panel). The panel for three  
25 supermarkets in Malmö, Sweden was similar to the panels for Podgorica, Montenegro and Skopje,  
26 The Former Yugoslav republic of Macedonia and was very different from the zero values found in  
27 the supermarkets in Copenhagen, Oslo, and Stockholm.  
28  
29

30  
31 A total of 83 packages of biscuits/cakes/wafers with high amounts of TF were bought in the ethnic  
32 shops in five capitals and in Malmö; this number varied between nine and 20 for each shop (figure  
33 2). Furthermore, 60% of the products had more than 20% of the fat as I-TF. Many of the products  
34 were the same in the six countries. These foods were also found in Copenhagen, which is surprising  
35  
36  
37  
38  
39  
40  
41  
42  
43  
44  
45  
46  
47  
48  
49  
50  
51  
52  
53  
54  
55  
56  
57  
58  
59  
60



1  
2  
3  
4 because their sale is illegal in Denmark, in contrast to the other countries in which the foods were  
5  
6 found.  
7  
8  
9

## 10 **Discussion**

### 11 **Products with industrial *trans* fat in supermarkets**

12  
13 In each of 20 European capitals, three large supermarkets were visited in 2012-13, and in five of the  
14  
15 capitals and in Malmö, Sweden, an additional three ethnic shops were visited. A total of 598  
16  
17 packages containing biscuits/cakes/wafers were bought and analysed for TF content, and 396 of  
18  
19 these products contained high amounts of I-TF (more than 2 grams per 100 grams of fat). In several  
20  
21 products, the I-TF content was higher than 40 grams per 100 grams of fat. Similarly high values of  
22  
23 I-TF in foods bought in Poland and in Serbia have also been reported in Polish and Serbian  
24  
25 studies.<sup>16,17</sup> The findings clearly demonstrate that I-TF is still present in 2013 in high concentrations  
26  
27 in popular foods in many countries in Europe (figures 1 and 2).  
28  
29  
30  
31

32  
33 Some foods with partially hydrogenated fat or a similar term in the list of ingredients did not  
34  
35 contain significant amounts of TF. A mixture of cis fat and fully hydrogenated fat without TF is  
36  
37 understood by some food producers to be partially hydrogenated fat.  
38  
39

40  
41 In all 20 countries except for Denmark and Austria, it is legal to use as much I-TF in foods as  
42  
43 technically possible without providing the quantity on the list of ingredients. Governments and  
44  
45 consumer associations strive to follow the recommendations of the WHO. The voluntary reduction  
46  
47 in the amount of I-TF in foods by food producers appears to work well in some countries, but not in  
48  
49 others. Food producers in a given country or in neighbouring countries may remove I-TF from their  
50  
51 products, but importing products with high I-TF content from more distant countries may  
52  
53 counteract the initiatives, as demonstrated in the supermarkets in southern Sweden (figure 1, panel  
54  
55 4). Based on previous measurements, the I-TF content in biscuits/cakes/wafers from supermarkets  
56  
57  
58  
59  
60

1  
2  
3  
4 in Germany, France, and the UK was nearly eliminated between 2005 and 2009,<sup>15</sup> and no products  
5  
6 with significant amounts of TF were found in 2013 (figure 1). This result contrasts with the  
7  
8 situation in Poland, Bulgaria, and Romania, where there were no obvious changes in the presence of  
9  
10 I-TF in foods between 2006 and 2013 (figure 3). The products in these countries were primarily  
11  
12 from local food producers. Hungary and, especially, the Czech Republic showed a decline in high-I-  
13  
14 TF foods during the same period.  
15  
16  
17  
18  
19

### 20 **Products with industrial *trans* fat in ethnic shops**

21  
22 Although the number of consumers who regularly buy food in ethnic shops is lower than the  
23  
24 number of consumers who purchase food in large supermarkets, the harmful effect of I-TF is still  
25  
26 present if the average intake at the personal level exceeds the recommended level. In many of the  
27  
28 countries in Western Europe, mortality due to heart disease among immigrants far exceeds the  
29  
30 mortality rate in the indigenous population. Using the same Internet procedure that was used to  
31  
32 identify shops with Balkan foods in other countries, three ethnic shops where pre-packaged  
33  
34 biscuits/cakes/wafers with high amounts I-TF were available were found in Copenhagen. These  
35  
36 sales are illegal and can be stopped immediately by the food authorities, if they desire.<sup>19</sup>  
37  
38  
39

40 In Southern Sweden, biscuits/cakes/wafers with high amounts of I-TF are present not only in small  
41  
42 ethnic shops (figure 2) but also in large supermarkets (figure 1). This type of product has spread  
43  
44 from the small ethnic shops to large supermarkets, suggesting considerable sales of these products,  
45  
46 which remain legal in Sweden. The Swedish parliament decided in 2011 that Sweden should adopt  
47  
48 the same I-TF legislation as Denmark, but the Swedish government decided to postpone the  
49  
50 implementation on the advice of the Swedish food authorities because they found that all of the  
51  
52 large food suppliers in Sweden, Norway, and Denmark had removed I-TF from products sold in  
53  
54 Sweden.<sup>11</sup> They did not take into account the free flow of goods across borders in Europe. Many  
55  
56  
57  
58  
59  
60

1  
2  
3  
4 products with high amounts of I-TF have ingredient lists in more than 10 different languages,  
5  
6 suggesting that they are potentially exported to many different countries. Retailers distributing these  
7  
8 foods are present in Sweden and in other European countries, and the majority of products with  
9  
10 high amounts of I-TF can be bought on the Internet. Although foods with high amounts of I-TF  
11  
12 were not found in large supermarkets in other Western countries, the Swedish story may repeat  
13  
14 elsewhere.

15  
16  
17 The strength of this study is that it provides up to date data about the availability of popular foods  
18  
19 containing high amounts of I-TF in 20 European countries. One weakness of the study is that the  
20  
21 average daily intake of I-TF was not measured in subgroups of the population in the various  
22  
23 countries but instead was inferred from the presence of biscuits/cakes/wafers with high amounts of  
24  
25 I-TF in large supermarkets. The following assumptions led to the conclusion that these products  
26  
27 have harmful effects: 1) the analysed brands of biscuits/cakes/wafers were stocked at the  
28  
29 supermarkets because they are sold in considerable amounts; 2) the majority of these foods are  
30  
31 regularly bought and consumed by the same subgroups of consumers; and 3) the findings in the  
32  
33 supermarkets in each capital are representative of the country. In addition, the presence of I-TF in  
34  
35 these products may be a marker of I-TF in other products, including products that are not sold in  
36  
37 pre-packaged form. Another weakness of the study is that the foods were only bought in large  
38  
39 supermarkets or in small ethnic shops with foods from the Balkans. The I-TF content in other foods  
40  
41 sold by small, privately owned shops or street vendors was not examined. High amounts of I-TF  
42  
43 prolong the shelf life of foods, and it is reasonable to assume that this factor is even more important  
44  
45 for small shops than it is for larger supermarkets. The selective pattern of purchasing in the present  
46  
47 study may thus have led to an underestimation of the amounts of I-TF consumed by subgroups of  
48  
49 the population, such as truck and taxi drivers, manual labourers, and members of minority ethnic  
50  
51  
52  
53  
54  
55  
56  
57  
58  
59  
60

1  
2  
3  
4 groups, who already have an increased risk of coronary heart disease partly because of lifestyle  
5 factors such as smoking, poor diet, and metabolic syndrome.<sup>20</sup>  
6  
7  
8  
9

### 10 **A legislative limit of industrial trans fat in foods or a voluntary reduction**

11  
12 In 2013, EU countries, with the exceptions of Austria and Denmark, legally allow foods with a  
13 maximum amount of I-TF as a percentage of the total fat content (up to 60%) to be sold without  
14 notice as long as the food is unpackaged, as it is in restaurants and fast food outlets. If the food is  
15 pre-packaged, the law requires the presence of I-TF to be noted only by the term “partially  
16 hydrogenated fat” on the list of ingredients. Most consumers do not recognise the hazard concealed  
17 therein and will not attempt to decipher the often illegible text in the list of ingredients.<sup>21–23</sup>  
18  
19

20 Societal pressure on food producers has undoubtedly resulted in a reduction in the population-level  
21 mean intake of I-TF from 2005 to 2013, especially in Western EU countries,<sup>15</sup> but high intake of I-  
22 TF is still possible in Eastern Europe and South-eastern European countries, with no obvious  
23 downward trend in the availability of these foods from 2006 to 2013 in three of the countries (figure  
24 3). High intake of I-TF in subgroups will continue as long as popular foods with a high  
25 concentration of I-TF are available. Although labelling foods with I-TF content may further reduce  
26 the mean intake of I-TF, such labelling still allows for the intake of high amounts because fast food  
27 in restaurants is not labelled and because consumers might not pay attention to or understand the  
28 labels.<sup>23</sup> An important advantage of a legislative limit on the I-TF content of food is that it does not  
29 require that the population learn about the health risks of I-TF or pay attention to the labels of food  
30 products. Furthermore, it is much simpler and less expensive to monitor the presence of I-TF in  
31 foods than to monitor the actual intake of I-TF in at-risk subgroups of the population.  
32  
33

34  
35 Because many of the biscuits/cakes/wafers in the supermarkets that were visited did not contain I-  
36 TF, a legislative I-TF limit would not affect the supply of these foods and would most likely  
37  
38  
39  
40  
41  
42  
43  
44  
45  
46  
47  
48  
49  
50  
51  
52

1  
2  
3  
4 moderately affect the production of most food producers. It has been shown that I-TF in cakes,  
5  
6 cookies and micro wave popcorn can be replaced by a mixture of saturated, monounsaturated, and  
7  
8 polyunsaturated fat, which is a healthier fat composition than a one-to-one substitution of I-TF with  
9  
10 saturated fat.<sup>24</sup> A reduction in I-TF content without a commensurate increase in saturated fats was  
11  
12 found in fast food purchases in New York City's restaurants after legislative restriction of I-TF in  
13  
14 restaurants.<sup>25</sup> The regulations in Austria, Denmark, Switzerland, and Iceland have shown that the  
15  
16 health risks of high intake of I-TF can be eliminated for the entire population without any noticeable  
17  
18 side effects for consumers. The extent to which the difference in the presence of I-TF in popular  
19  
20 foods in Eastern and Western Europe contributes to the much higher mortality from coronary heart  
21  
22 disease in Eastern Europe than in Western Europe remains to be determined.<sup>26</sup> The same does the  
23  
24 extent to which the more than 70% reduction from 1980 to 2009 in coronary mortality among  
25  
26 Danish males and females (the highest reduction in the European Union) is due to a minimal intake  
27  
28 of I-TF in all subgroups in Denmark during the latter part of this period.<sup>26</sup>  
29  
30  
31  
32  
33  
34

35 The effectiveness of policies for reducing dietary TF was recently assessed based on studies  
36  
37 published between 2005 and 2012.<sup>27</sup> It was found that "bans were most effective in eliminating TF  
38  
39 from the food supply, whereas mandatory TF labelling and voluntary TF limits had a varying  
40  
41 degree of success". This statement is strongly supported by the findings in the present study  
42  
43 concerning the current availability of popular foods with high amounts of I-TF in Europe.  
44  
45  
46  
47  
48  
49  
50  
51  
52  
53  
54  
55  
56  
57  
58  
59  
60

-----

**Contributorship statement:**

SS and JD were both responsible for the concept design of the study, for collection of food items, registration and labelling. SS and JD produced the first draft of the study and SS, JD and AA were responsible for critical revision of the manuscript. SS is the manuscripts guarantor.

**Competing interest:**

No competing interests

"All authors have completed the ICMJE uniform disclosure form at [www.icmje.org/coi\\_disclosure.pdf](http://www.icmje.org/coi_disclosure.pdf) and declare: no support from any organization for the submitted work; no financial relationships with any organizations that might have an interest in the submitted work in the previous three years; no other relationships or activities that could appear to have influenced the submitted work."

**Ethics committee:**

The study does not require an approval from the Ethics committee

**Acknowledgements:**

We acknowledge the support from Jenny Vissings Foundation, University of Copenhagen and the Department of Clinical Biochemistry, Gentofte University Hospital

**Role of the funding source:**

1  
2  
3  
4 The sponsor of the study had no role in the study design, data collection, analysis, and  
5  
6 interpretation, the writing of the report, or the decision to submit the article for publication. The  
7  
8 corresponding author had full access to all of the data for the study and had final responsibility for  
9  
10 the decision to submit the manuscript for publication.  
11  
12

### 13 14 15 **Copyright statement:**

16  
17 The Corresponding Author has the right to grant on behalf of all authors and does grant on behalf of  
18  
19 all authors, a worldwide licence to the Publishers and its licensees in perpetuity, in all forms,  
20  
21 formats and media (whether known now or created in the future), to i) publish, reproduce,  
22  
23 distribute, display and store the Contribution, ii) translate the Contribution into other languages,  
24  
25 create adaptations, reprints, include within collections and create summaries, extracts and/or,  
26  
27 abstracts of the Contribution, iii) create any other derivative work(s) based on the Contribution, iv)  
28  
29 to exploit all subsidiary rights in the Contribution, v) the inclusion of electronic links from the  
30  
31 Contribution to third party material where-ever it may be located; and, vi) licence any third party to  
32  
33 do any or all of the above.”  
34  
35  
36  
37  
38  
39

### 40 **Transparency declaration:**

41 Steen Stender (the manuscript's guarantor) affirms that the manuscript is an honest, accurate, and  
42  
43 transparent account of the study being reported; that no important aspects of the study have been  
44  
45 omitted; and that any discrepancies from the study as planned (and, if relevant, registered) have  
46  
47 been explained  
48  
49  
50

### 51 52 **Data sharing statements:**

53 The data used to construct figure 1-3 can be shared by emailing Steen Stender  
54  
55  
56  
57  
58  
59  
60

## References

- 1 Wahle KWJ, James WPT. Isomeric fatty acids and human health. *Eur J Clin Nutr* 1993; **47**: 828–39.
- 2 Mozaffarian D, Katan MB, Ascherio A, Stampfer MJ, Killeit WC. *Trans* fatty acids and cardiovascular disease. *N Engl J Med* 2006; **354**: 601–3.
- 3 Kiage JN, Merrill PD, Robinson CJ, Cao Y, Malik TA, Hundley BC et al. Intake of trans fat and all-cause mortality in the Reasons for geographical and Racial Differences in Stroke (REGARDS) cohort. *Am J Clin Nutr* 2013; **97**: 1121–8
- 4 Brouwer IA, Wanders AJ, Katan MB. *Trans* fatty acids and cardiovascular health: research completed? *Eur J Clin Nutr* 2013; **67**, 1–7
- 5 Decsi T and Boehm G. *trans* Isomeric fatty acids are inversely related to the availability of long-chain PUFAs in the perinatal period. *Am J Clin Nutr* 2013; **98**(suppl): 543S–8S
- 6 WHO Scientific Update on trans fatty acids: summary and conclusions. Uauy R, Aro A, Clarke R, et al. *Eur J Clin Nutr*. 2009;**63**, 68S–75S
- 7 Dietary Guidelines for Americans 2010.  
[www.health.gov/dietaryguidelines/dga2010/DietaryGuidelines2010.pdf](http://www.health.gov/dietaryguidelines/dga2010/DietaryGuidelines2010.pdf) (Accessed October, 2013)
- 8 Stender S, Dyerberg J. The influence of *trans* fatty acids on health – Fourth edition. A report from the Danish Nutrition Council. 2003. <http://www.meraadet.dk/default.asp?id=1347> (Accessed October, 2013)



- 1  
2  
3  
4 9 Stop Press: Commission drops Danish trans fat case. *EU Food Law Weekly* 2007; **295** (23  
5  
6 March).
- 7  
8  
9 10 US FDA  
10 [http://www.nytimes.com/2013/11/08/health/fda-trans-fats.html?hp&\\_r=1&](http://www.nytimes.com/2013/11/08/health/fda-trans-fats.html?hp&_r=1&)  
11 (accessed November 2013)
- 12  
13 11 Sveriges Riksdag  
14  
15 <http://www.riksdagen.se/sv/Debatter-->  
16  
17 [beslut/Interpellationsdebatter1/Debatt/?did=H010498&doctype=ip#pos=865](http://www.riksdagen.se/sv/Debatter--beslut/Interpellationsdebatter1/Debatt/?did=H010498&doctype=ip#pos=865) (Accessed  
18  
19 November, 2013)
- 20  
21  
22 12 [http://www.eurofoodlaw.com/country-reports/eu-member-states/hungary/hungary-to-limit-](http://www.eurofoodlaw.com/country-reports/eu-member-states/hungary/hungary-to-limit-transfats-track-consumption-69040.htm)  
23  
24 [transfats-track-consumption-69040.htm](http://www.eurofoodlaw.com/country-reports/eu-member-states/hungary/hungary-to-limit-transfats-track-consumption-69040.htm) (Accessed November, 2013)
- 25  
26 13 Norwegian Government  
27  
28 <http://www.regjeringen.no/nb/dokumentarkiv/stoltenberg-ii/hod/Nyheter-og->  
29  
30 [pressemeldinger/pressemeldinger/2013/stortingsmelding-om-folkehelse-god-](http://www.regjeringen.no/nb/dokumentarkiv/stoltenberg-ii/hod/Nyheter-og-pressemeldinger/pressemeldinger/2013/stortingsmelding-om-folkehelse-god-)  
31  
32 [helse.html?id=725238](http://www.regjeringen.no/nb/dokumentarkiv/stoltenberg-ii/hod/Nyheter-og-pressemeldinger/pressemeldinger/2013/stortingsmelding-om-folkehelse-god-helse.html?id=725238) (Accessed November, 2013)
- 33  
34  
35 14 Stender S, Dyerberg J, Bysted A, Leth T, Astrup A. A *trans* world journey. *Atheroscler* 2006;  
36  
37 (Suppl 7): P47–52.
- 38  
39 15 Stender S, Astrup A, Dyerberg J. A *trans* European Union difference in the decline in *trans*  
40  
41 fatty acids in popular foods: a market basket investigation. *BMJ Open* 2012; **2**:e000859
- 42  
43  
44 16 Regulation (EU) No 1169/2011 of the European Parliament and of the Council of 25 October  
45  
46 2011 L 304/35  
47  
48 <http://eur-lex.europa.eu/LexUriServ/LexUriServ.do?uri=OJ:L:2011:304:0018:0063:EN:PDF>  
49  
50 (Accessed November, 2013)
- 51  
52  
53  
54  
55  
56  
57  
58  
59  
60

- 1  
2  
3  
4 17 Zbikowska A, Krygier K. Changes in the Fatty Acids Composition, Especially *Trans* isomers,  
5 and Heat Stability of Selected Frying Fats Available on the Polish Market in the Years 1997  
6 and 2008. *Pol. J. Food Nutr. Sci.* 2011; **61** (1): 45–9  
7  
8  
9  
10  
11 18 Kravic SZ, Suturovic ZJ, Svarc-Gajic JV, Stojanovic ZS, Pucarevic MM, Nikolic IR.  
12 Fatty acid composition including trans-isomers of Serbian biscuits. *Hem. Ind*; 2011: **65** (2)  
13 139–46  
14  
15  
16  
17 19 Danish trans fat legislation  
18 <http://www.foedevarestyrelsen.dk/english/food/trans%20fatty%20acids/Pages/default.aspx>  
19 (Accessed November, 2013)  
20  
21  
22  
23 20 Gill PE and Wijk K. Case study of a healthy eating intervention for Swedish lorry drivers.  
24 *Health Education Research.* 2004; **19(3)**: 306–15  
25  
26  
27  
28 21 Consumers find food labelling confusing.  
29 <http://www.guardian.co.uk/money/2009/may/07/food-drink-health-labels> (Accessed  
30 November 2013)  
31  
32  
33  
34 22 Borra S. Consumer perspectives on food labels. *Am J Clin Nutr*; 2006; **83(5)**: 1235S  
35  
36  
37 23 Jasti S and Kovacs S. Use of Trans fat Information on Food Labels and Its Determinants in a  
38 Multiethnic College Student Population. *Journal of Nutrition Education and Behavior.* 2010;  
39 **42**: 307–14  
40  
41  
42  
43 24 Stender S, Astrup P, Dyerberg J. What Went In When Trans Went Out? *N Engl J Med* 2009;  
44 **361**: 314–16  
45  
46  
47  
48 25 Angell SY, Cobb LK, Curtis CJ, Konty KJ, Silver LD. Change in Trans fatty Acid Content of  
49 Fast-Food Purchases Associated with New York City’s Restaurant Regulation. *Ann Intern*  
50 *Med* 2012; **157**: 81-86  
51  
52  
53  
54  
55  
56  
57  
58  
59  
60

- 1  
2  
3  
4 26 Nichols M, Townsend N, Scarborough P, Rainer M. Trends in age-specific coronary heart  
5 disease mortality in the European Union over three decades:1980-2009. *Eur Heart J* 2013  
6 Oct; **34(39)**:3017-27  
7  
8  
9  
10 27 Downs MS, Thow AM, Leeder SR. The effectiveness of policies for reducing dietary trans fat:  
11 a systematic review of the evidence. *Bull World Health Organ.* 2013; **91**: 262–269H  
12  
13  
14  
15  
16  
17  
18  
19  
20  
21

22 **Legends**

23  
24  
25  
26 **Figure 1**

27  
28 Amounts of industrial *trans* fat in 100 grams of pre-packaged biscuits/cakes/wafers bought in three  
29 supermarkets in each of 20 European capitals and in Malmö, Sweden in 2012-2013. Each bar in a  
30 panel represents a product. The products are ranked according to the content of industrial *trans* fat.  
31  
32 Products are only shown if their TF content constitutes more than 2% of the total fat content, and  
33 the numbers of these products are shown in each panel. Products were bought if “partially  
34 hydrogenated fat” or a similar term was listed high in the list of ingredients and if the food label  
35 indicated that the total fat content was equal to or exceeded 15 grams of fat per 100 grams of  
36 product. The number in parentheses is the number of foods that fulfilled the inclusion criteria. It  
37 was not possible to find products that fulfilled the inclusion criteria in large supermarkets in  
38 London, Paris, Berlin, Vienna, Copenhagen, Oslo, and Stockholm. FYROM (The Former Yugoslav  
39 republic of Macedonia)  
40  
41  
42  
43  
44  
45  
46  
47  
48  
49  
50  
51  
52

53  
54  
55 **Figure 2**

1  
2  
3  
4 Amounts of industrial *trans* fat in 100 grams of pre-packaged biscuits/cakes/wafers  
5  
6 bought in three ethnic shops in five European capitals in 2012-2013 and in Southern  
7  
8 Sweden. Each bar in a panel represents a product. The products bought in each city are  
9  
10 ranked according to the content of industrial *trans* fat in the product. Products are only  
11  
12 shown if their TF content constitutes more than 2% of the total fat content, and the  
13  
14 numbers of these products are shown in each panel. Products were bought if “partially  
15  
16 hydrogenated fat” or a similar term was listed high in the list of ingredients and if the  
17  
18 food label indicated that the total fat content was equal to or exceeded 15 grams of fat  
19  
20 per 100 grams of product. The number in parentheses is the number of foods that  
21  
22 fulfilled the inclusion criteria.  
23  
24  
25  
26  
27

### 28 **Figure 3**

29  
30 Amounts of industrial *trans* fat in 100 grams of pre-packaged biscuits/cakes/wafers  
31  
32 bought in three supermarkets in each of five capitals in Eastern Europe in 2013. The  
33  
34 values from figure 1 are given together with values obtained using the same procedure  
35  
36 in 2006.  
37  
38  
39  
40  
41  
42  
43  
44  
45  
46  
47  
48  
49  
50  
51  
52  
53  
54  
55  
56  
57  
58  
59  
60

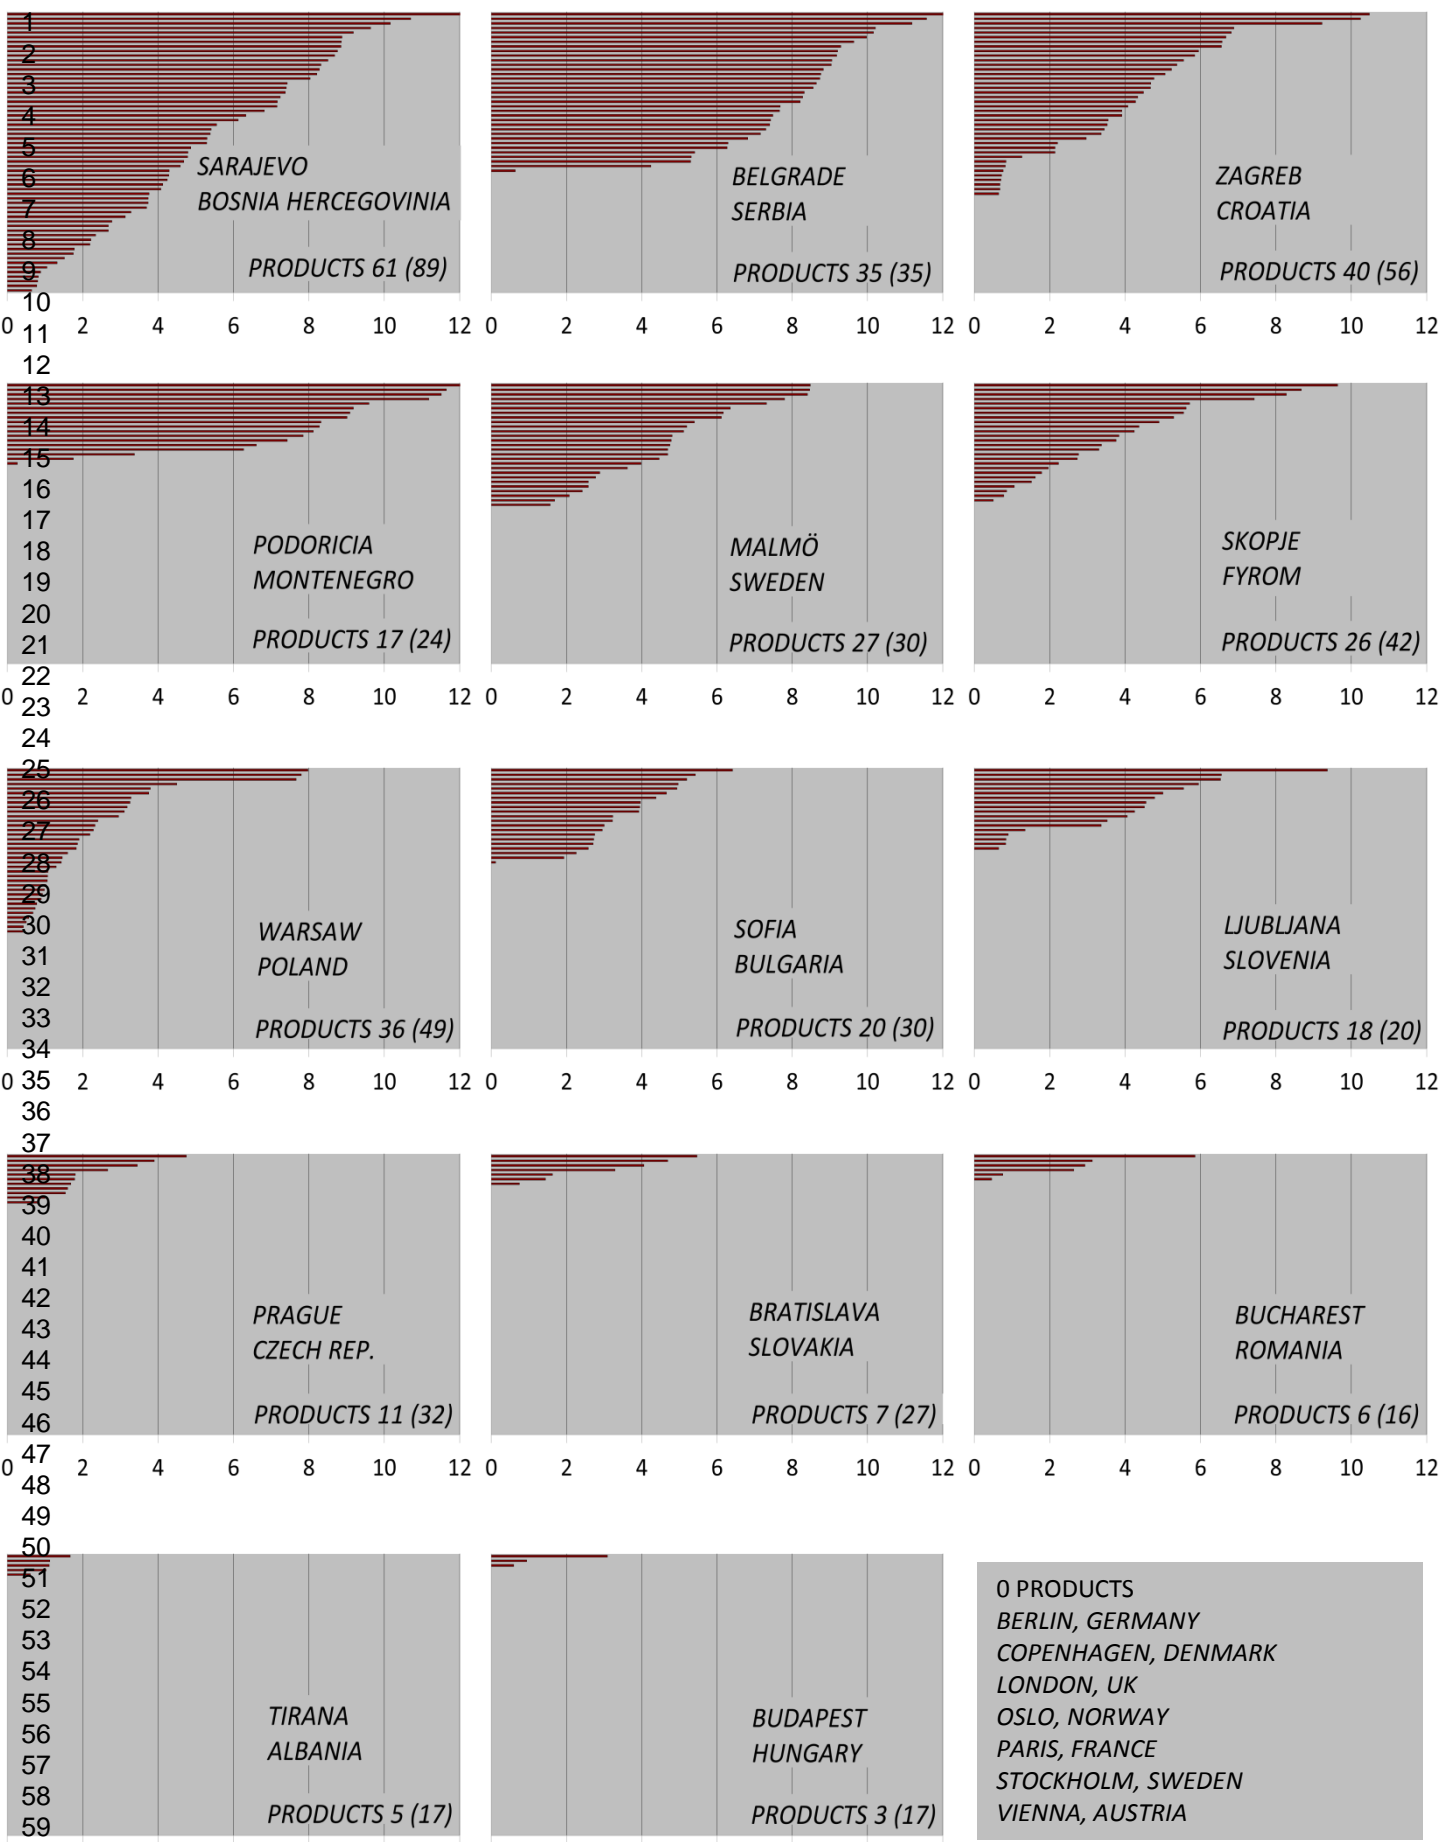

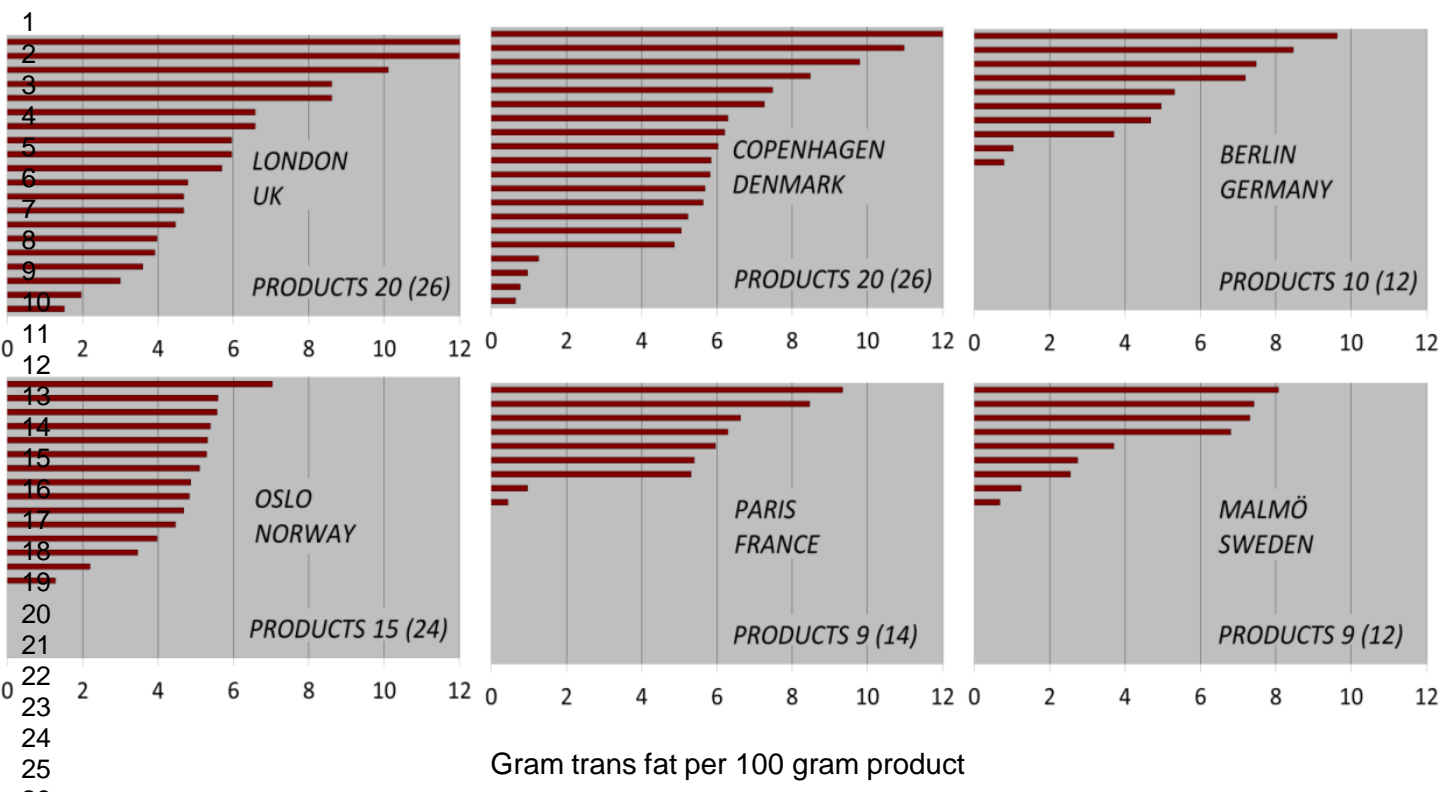

1  
2  
3  
4  
5  
6  
7  
8  
9  
10  
11  
12  
13  
14  
15  
16  
17  
18  
19  
20  
21  
22  
23  
24  
25  
26  
27  
28  
29  
30  
31  
32  
33  
34  
35  
36  
37  
38  
39  
40  
41  
42  
43  
44  
45  
46  
47  
48  
49  
50  
51  
52  
53  
54  
55  
56  
57  
58  
59  
60

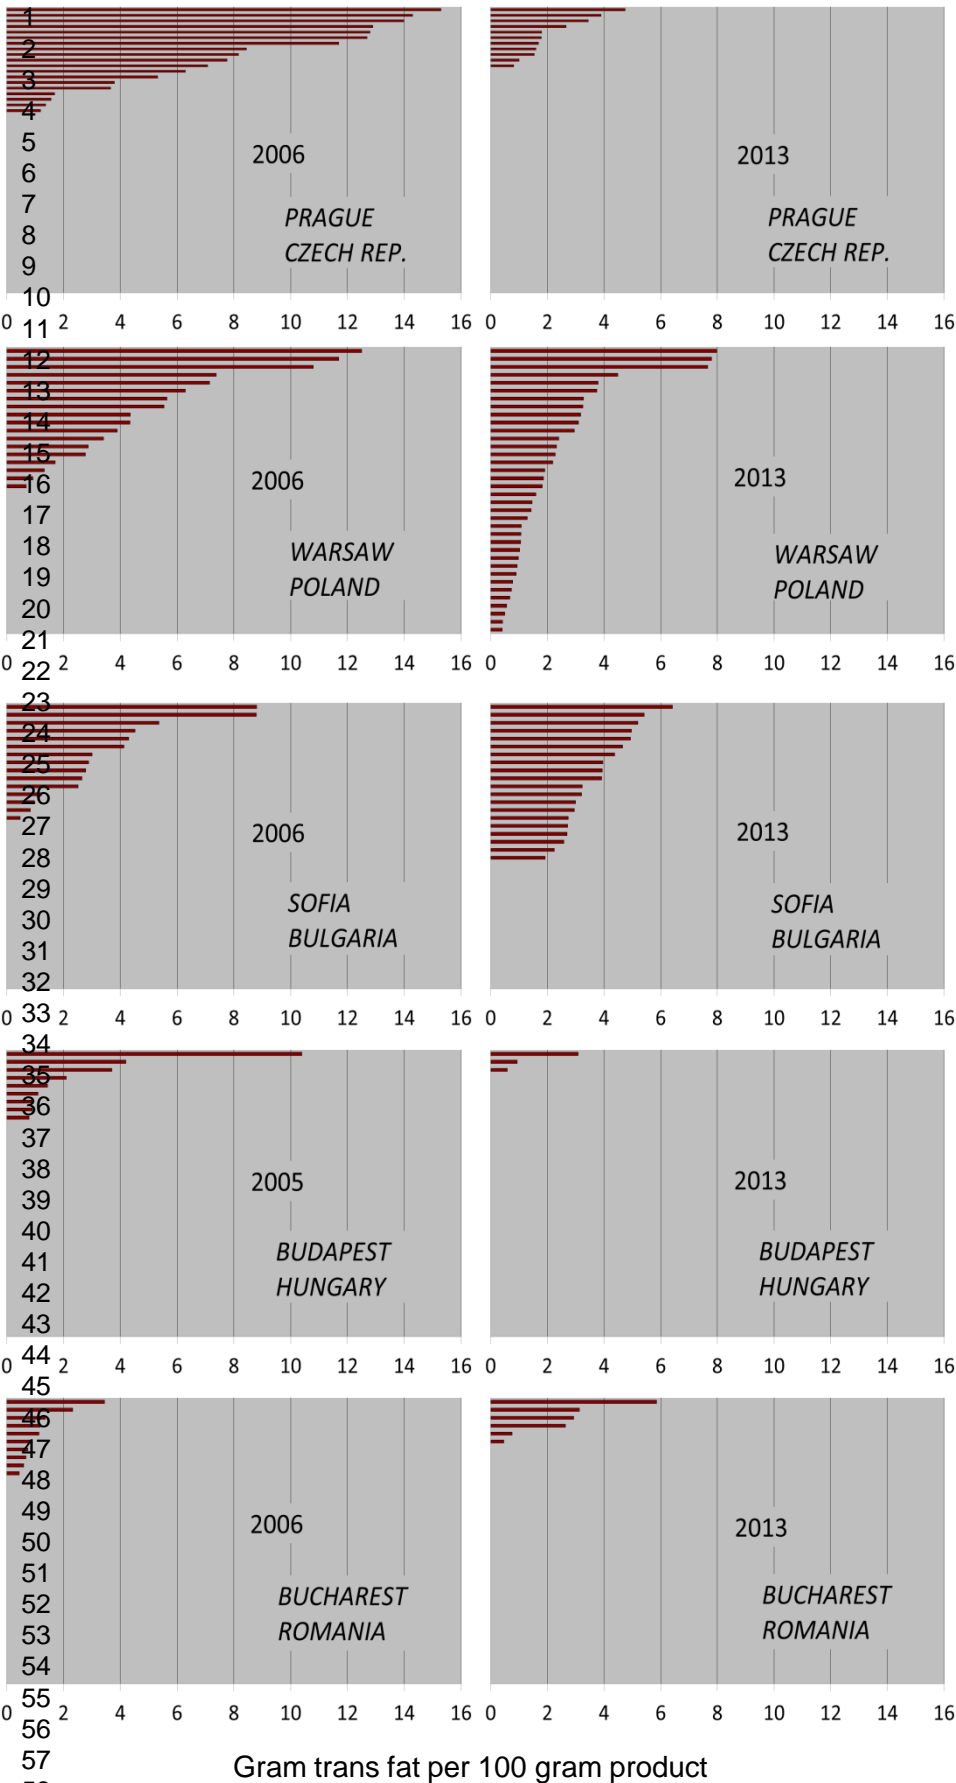

Gram trans fat per 100 gram product

## Industrial *trans* fat in popular foods is still a health issue in Europe: a market basket investigation

This paper is a rather special epidemiologic observational study: a market basket investigation. We have gone through the various 22 points in the STROBE checklist and have made sure that relevant points for this study are fulfilled. FOR EACH ITEM NO WE HAVE ADDED THE PAGE NUMBER IN CAPITALS FOR THE PAGES WITH THE APPROPRIATE SENTENCES

STROBE Statement—Checklist of items that should be included in reports of *cross-sectional studies*

|                           | Item No | Recommendation                                                                                                                                                                                                                                                                                                                                                                                                |
|---------------------------|---------|---------------------------------------------------------------------------------------------------------------------------------------------------------------------------------------------------------------------------------------------------------------------------------------------------------------------------------------------------------------------------------------------------------------|
| <b>Title and abstract</b> | 1       | (a) Indicate the study's design with a commonly used term in the title or the abstract PAGE 1 "market basket investigation"<br>(b) Provide in the abstract an informative and balanced summary of what was done and what was found PAGE 2                                                                                                                                                                     |
| <b>Introduction</b>       |         |                                                                                                                                                                                                                                                                                                                                                                                                               |
| Background/rationale      | 2       | Explain the scientific background and rationale for the investigation being reported PAGE 3                                                                                                                                                                                                                                                                                                                   |
| Objectives                | 3       | State specific objectives, including any prespecified hypotheses PAGE 4                                                                                                                                                                                                                                                                                                                                       |
| <b>Methods</b>            |         |                                                                                                                                                                                                                                                                                                                                                                                                               |
| Study design              | 4       | Present key elements of study design early in the paper PAGE 4-5                                                                                                                                                                                                                                                                                                                                              |
| Setting                   | 5       | Describe the setting, locations, and relevant dates, including periods of recruitment, exposure, follow-up, and data collection. PAGE 5                                                                                                                                                                                                                                                                       |
| Participants              | 6       | (a) Give the eligibility criteria, and the sources and methods of selection of participants HERE IT IS FOOD PRODUCTS DESCRIBED AT PAGE 5                                                                                                                                                                                                                                                                      |
| Variables                 | 7       | Clearly define all outcomes, exposures, predictors, potential confounders, and effect modifiers. Give diagnostic criteria, if applicable NOT APPLICABLE                                                                                                                                                                                                                                                       |
| Data sources/measurement  | 8*      | For each variable of interest, give sources of data and details of methods of assessment (measurement). Describe comparability of assessment methods if there is more than one group AMOUNTS OF TRANS FAT PAGE 6                                                                                                                                                                                              |
| Bias                      | 9       | Describe any efforts to address potential sources of bias ANALYTICAL BIAS IN TRANS FAT RESULTS WERE ADDRESSED BY CHOOSING AN ISO_CERTIFIED LABORATORY PAGE 6                                                                                                                                                                                                                                                  |
| Study size                | 10      | Explain how the study size was arrived at PAGE 4                                                                                                                                                                                                                                                                                                                                                              |
| Quantitative variables    | 11      | Explain how quantitative variables were handled in the analyses. If applicable, describe which groupings were chosen and why FIG1-3; PAGE 6-7                                                                                                                                                                                                                                                                 |
| Statistical methods       | 12      | (a) Describe all statistical methods, including those used to control for confounding NOT RELEVANT IN THIS PAPER<br>(b) Describe any methods used to examine subgroups and interactions NOT RELEVANT IN THIS PAPER<br>(c) Explain how missing data were addressed NOT RELEVANT IN THIS PAPER<br>(d) If applicable, describe analytical methods taking account of sampling strategy NOT RELEVANT IN THIS PAPER |



(e) Describe any sensitivity analyses NOT RELEVANT IN THIS PAPER

| <b>Results</b>           |     |                                                                                                                                                                                                                                                                                                                                                                                                                                                                                                |
|--------------------------|-----|------------------------------------------------------------------------------------------------------------------------------------------------------------------------------------------------------------------------------------------------------------------------------------------------------------------------------------------------------------------------------------------------------------------------------------------------------------------------------------------------|
| Participants             | 13* | (a) Report numbers of individuals at each stage of study—eg numbers potentially eligible, examined for eligibility, confirmed eligible, included in the study, completing follow-up, and analysed FIGURE 1 AND 2<br>(b) Give reasons for non-participation at each stage NOT RELEVANT IN THIS PAPER<br>(c) Consider use of a flow diagram NOT RELEVANT IN THIS PAPER                                                                                                                           |
| Descriptive data         | 14* | (a) Give characteristics of study participants (eg demographic, clinical, social) and information on exposures and potential confounders PRE-PACKAGED BISCUITS/CAKES/WAFERS PAGE 5<br>(b) Indicate number of participants with missing data for each variable of interest NOT RELEVANT IN THIS PAPER                                                                                                                                                                                           |
| Outcome data             | 15* | Report numbers of outcome events or summary measures FIGURE 1-3 AND “Of the 312 products made by 51 factories in 15 European countries, 40% of the products had more than 20% of the fat as I-TF” PAGE 6                                                                                                                                                                                                                                                                                       |
| Main results             | 16  | (a) Give unadjusted estimates and, if applicable, confounder-adjusted estimates and their precision (eg, 95% confidence interval). Make clear which confounders were adjusted for and why they were included NOT RELEVANT IN THIS PAPER<br>(b) Report category boundaries when continuous variables were categorized NOT RELEVANT IN THIS PAPER<br>(c) If relevant, consider translating estimates of relative risk into absolute risk for a meaningful time period NOT RELEVANT IN THIS PAPER |
| Other analyses           | 17  | Report other analyses done—eg analyses of subgroups and interactions, and sensitivity analyses NOT RELEVANT IN THIS PAPER                                                                                                                                                                                                                                                                                                                                                                      |
| <b>Discussion</b>        |     |                                                                                                                                                                                                                                                                                                                                                                                                                                                                                                |
| Key results              | 18  | Summarise key results with reference to study objectives PAGE 7                                                                                                                                                                                                                                                                                                                                                                                                                                |
| Limitations              | 19  | Discuss limitations of the study, taking into account sources of potential bias or imprecision. Discuss both direction and magnitude of any potential bias PAGE 9                                                                                                                                                                                                                                                                                                                              |
| Interpretation           | 20  | Give a cautious overall interpretation of results considering objectives, limitations, multiplicity of analyses, results from similar studies, and other relevant evidence PAGE 11                                                                                                                                                                                                                                                                                                             |
| Generalisability         | 21  | Discuss the generalisability (external validity) of the study results PAGE 9                                                                                                                                                                                                                                                                                                                                                                                                                   |
| <b>Other information</b> |     |                                                                                                                                                                                                                                                                                                                                                                                                                                                                                                |
| Funding                  | 22  | Give the source of funding and the role of the funders for the present study and, if applicable, for the original study on which the present article is based PAGE 13                                                                                                                                                                                                                                                                                                                          |

\*Give information separately for exposed and unexposed groups.

**Note:** An Explanation and Elaboration article discusses each checklist item and gives methodological background and published examples of transparent reporting. The STROBE checklist is best used in conjunction with this article (freely available on the Web sites of PLoS Medicine at <http://www.plosmedicine.org/>, Annals of Internal Medicine at <http://www.annals.org/>, and Epidemiology at <http://www.epidem.com/>). Information on the STROBE Initiative is available at [www.strobe-statement.org](http://www.strobe-statement.org).

# BMJ Open

## Tracing artificial trans fat in popular foods in Europe: a market basket investigation

|                                 |                                                                                                                                                                                                                                                                       |
|---------------------------------|-----------------------------------------------------------------------------------------------------------------------------------------------------------------------------------------------------------------------------------------------------------------------|
| Journal:                        | <i>BMJ Open</i>                                                                                                                                                                                                                                                       |
| Manuscript ID:                  | bmjopen-2014-005218.R1                                                                                                                                                                                                                                                |
| Article Type:                   | Research                                                                                                                                                                                                                                                              |
| Date Submitted by the Author:   | 23-Apr-2014                                                                                                                                                                                                                                                           |
| Complete List of Authors:       | Stender, Steen; Copenhagen University Hospital Gentofte, Clinical Biochemistry<br>Astrup, Arne; Faculty of LifeSciences, University of Copenhagen, Nutrition, Excercise and Sports<br>Dyerberg, Jørn; Copenhagen University Hospital, Gentofte, Clinical Biochemistry |
| <b>Primary Subject Heading</b>: | Health policy                                                                                                                                                                                                                                                         |
| Secondary Subject Heading:      | Nutrition and metabolism, Health policy, Public health                                                                                                                                                                                                                |
| Keywords:                       | Health policy < HEALTH SERVICES ADMINISTRATION & MANAGEMENT, NUTRITION & DIETETICS, Ischaemic heart disease < CARDIOLOGY                                                                                                                                              |
|                                 |                                                                                                                                                                                                                                                                       |

SCHOLARONE™  
Manuscripts

## Tracing artificial trans fat in popular foods in Europe: a market basket investigation

Steen Stender, Arne Astrup, Jørn Dyerberg

Steen Stender professor, Department of Clinical Biochemistry, Copenhagen University Hospital, Gentofte, Niels Andersens Vej 65, DK-2900 Hellerup, Denmark. Arne Astrup professor Department of Nutrition, Exercise and Sports, Faculty of Sciences, University of Copenhagen, Rolighedsvej 30, DK-1958 Frederiksberg, Denmark. Jørn Dyerberg professor, Department of Clinical Biochemistry, Copenhagen University Hospital, Gentofte, Niels Andersens Vej 65, DK-2900 Hellerup, Denmark

Correspondence to S Stender [steen.stender@regionh.dk](mailto:steen.stender@regionh.dk)

## Abstract

**Objective:** To minimise the intake of industrial artificial *trans* fat (I-TF), nearly all European countries rely on food producers to voluntarily reduce the I-TF content in food. The objective of this study was to investigate the effect of this strategy on I-TF content in pre-packaged biscuits/cakes/wafers in 2012-2013 in 20 European countries.

**Design:** The I-TF content was assessed in a market basket investigation. Three large supermarkets were visited in each capital, and in some countries, three additional ethnic shops were included.

**Results:** A total of 598 samples of biscuits/cakes/wafers with “partially hydrogenated vegetable fat” or a similar term high on the list of ingredients were analysed, 312 products had more than 2 % of fat as I-TF, exceeding the legislatively determined I-TF limit in Austria and Denmark; the mean (SD) was 19(7)%. In seven countries, no I-TF was found, whereas nine predominantly Eastern European countries had products with very high I-TF content, and the remaining four countries had intermediate levels. Of the five countries that were examined using the same procedure as in 2006, three had unchanged I-TF levels in 2013, and two had lower levels. The 18 small ethnic shops examined in six Western European countries sold 83 products. The mean(SD) was 23(12)% of the fat as I-TF, all imported from countries in Balkan. In Sweden, this type of food imported from Balkan was also available in large supermarkets.

**Conclusion:** The findings suggest that subgroups of the population in many countries in Europe still consume I-TF in amounts that increase their risk of coronary heart disease. Under current EU legislation, the sale of products containing I-TF is legal but conflicts with the WHO recommendation to minimise the intake of I-TF. An EU-legislative limit on I-TF content in foods is expected to be an effective strategy to achieve this goal.

### Strengths and limitations of this study

- A strength is the measurement of TF in many popular foods obtained in large supermarkets in 20 different EU countries in 2012-13, and in popular foods obtained in ethnic shops in Berlin, Paris, London, Malmö and Copenhagen.

- In South-eastern Europe foods with high amounts of I-TF are present in large supermarkets and the same brands of foods with high amounts of I-TF are present in ethnic shops in Western Europe.
- Foods with high amounts of I-TF produced in some countries in Europe are legally exported to many other European countries.
- A limitation is that the average daily intake of I-TF was not measured, but instead inferred from the presence of popular foods with high amounts of I-TF in large super markets and in small ethnic shops.

## Introduction

*Trans* fat (TF) in food originates from the industrial hydrogenation of oils and from ruminant sources. Compared to non-hydrogenated oils, fats containing industrially produced artificial *trans* fat are solid at room temperature, have some technical advantages for food processing, and prolong the shelf life of products. I-TF can constitute up to 60% of the fat in certain foods, whereas ruminant fat contains 6% TF at most.<sup>1</sup> A meta-analysis of four large prospective studies found that an average intake of approximately five grams per day of TF, corresponding to 2% of the total energy intake, was associated with a 23% increase in the risk of coronary heart disease.<sup>2</sup> More recently, TF intake has also been associated with all-cause mortality in a large US-based study.<sup>3</sup> A 2013 review concluded that “the detrimental effects of industrial *trans* fatty acids on heart health are beyond dispute”.<sup>4</sup> Furthermore, inverse associations have been observed between TF and essential long-chain polyunsaturated fatty acids in the blood lipids of pregnant women and their offspring at birth as well as in human milk. Because the latter fatty acids are important for neurodevelopment in

1  
2  
3  
4 infancy, the potential untoward effect of TF exposure caused by fatty acid competition in the brain  
5  
6 has received increased attention.<sup>5-7</sup>  
7

8  
9 Based on the relationship between the intake of I-TF and heart disease, for years several public  
10  
11 health organisations have recommended that I-TF intake be lowered as much as possible.<sup>8-10</sup>  
12

13  
14 In 2003, Denmark introduced a legislative sales ban aimed at the final consumer, limiting the I-TF  
15  
16 content in the fat of foods to a maximum of 2%. The legislation applies to locally produced as well  
17  
18 as imported foods. The European Commission initially opposed this legislation but dropped its  
19  
20 infringement proceedings in March 2007 because of increasing scientific evidence about the  
21  
22 dangers of *trans* fat.<sup>11</sup> In 2005, Canada introduced mandatory labelling of the I-TF content in pre-  
23  
24 packaged foods. The US introduced mandatory labelling of TF on pre-packaged foods in 2006,  
25  
26 (US foods could be labelled “zero TFA” even if they contained 0.5 g per serving) followed by  
27  
28 legislative limits on I-TF in the food served in restaurants in New York City in 2008, and in the  
29  
30 state of California in 2010-11. FDA has proposed that partially hydrogenated oils, the source of I-  
31  
32 TF, no longer be “generally recognized as safe.” That means food companies would have to prove  
33  
34 that such oils are safe to eat.<sup>12</sup> In Europe in 2009, Austria and Switzerland introduced a legislative  
35  
36 ban similar to the Danish regulation, followed by Iceland in 2011 and probably by Sweden,  
37  
38 Hungary, and Norway in 2014.<sup>13-15</sup> However, in 2014, only a minority of the population in the EU  
39  
40 (i.e. less than 50 million of the 500 million people in the EU) is protected by legislation that makes  
41  
42 it illegal to sell foods with high amounts of I-TF to the final consumer.  
43  
44  
45  
46  
47

48  
49 The purpose of the present study is to examine whether there still is a potentially negative health  
50  
51 impact on vulnerable populations due to intake of I-TF contained in pre-packaged  
52  
53 biscuits/cakes/wafers in 20 European countries. These food items were chosen as they are  
54  
55 frequently consumed and easily accessible. They furthermore traditionally contain I-TF rich  
56  
57  
58  
59  
60

1  
2  
3  
4 partially hydrogenated vegetable oils as their major lipid ingredient.<sup>16</sup> Removal of I-TF in this  
5  
6 category of food has been slower than in other food categories.<sup>17</sup> I-TF content in these foods may be  
7  
8 a marker of I-TF in other products including products that are not sold in pre-packaged form.  
9  
10 The inclusion criteria for the food samples were defined based on the list of ingredients printed on  
11  
12 the packing. The same procedure was used in similar studies in 2006 and 2009.<sup>18,19</sup> We further  
13  
14 investigated whether products with high I-TF produced in some European countries were  
15  
16 disseminated to other European countries, including ethnic shops. The findings may be relevant to  
17  
18 the future regulation of the I-TF content in foods in the EU.<sup>20</sup> By December 2014, the Commission,  
19  
20 taking into account scientific evidence and experience acquired in Member States, intends to submit  
21  
22 a report on the presence of *trans* fats in foods. The aim of the report is to promote the provision of  
23  
24 healthier food options to consumers including the provision of information on *trans* fat or  
25  
26 restrictions on their use. The Commission shall accompany this report with a legislative proposal, if  
27  
28 appropriate.  
29  
30  
31  
32  
33  
34  
35

## 36 **Methods**

### 37 **Purchase of biscuits/cakes/wafers in supermarkets**

38  
39 The 20 countries visited encompass the countries in former Yugoslavia, its neighbouring countries,  
40  
41 three Scandinavian, and three large countries in northern Europe: Germany, France, and UK.  
42  
43

44  
45 The main tourist office in the capital of each country was asked to identify three large supermarkets,  
46  
47 preferably chain supermarkets with many large shops across the country. In several capitals, the  
48  
49 same stores visited in 2006 and in 2009 were visited in this study.<sup>18-19</sup>  
50  
51

### 52 *Inclusion criteria*

1  
2  
3  
4 As in the previous studies, packages of biscuits/cakes/wafers were obtained by systematically  
5  
6 examining the labels of the products placed on the appropriate shelves in the biscuits/cakes/wafers  
7  
8 section in the supermarket.  
9

10 Packages were purchased

- 11 • If “partially hydrogenated fat” or a similar term was listed among the first 4 on the list of  
12 ingredients (ranked according to content) and:  
13
- 14 • If total fat content was equal to or exceeded 15 grams of fat per 100 grams of product, since  
15 high fat food is generally defined as food containing more than 15-20 gram of total fat per  
16 100 gram food.<sup>21</sup>  
17
- 18 • If the label indicated the amount of *trans* fat per serving.  
19
- 20 • If the same product appeared in packages of different sizes, only the smallest size was  
21 bought.  
22
- 23 • If exactly the same package was found in two different supermarkets in the same capital,  
24 only the one with the latest “best before date” was included in the study.  
25  
26  
27  
28  
29  
30  
31  
32  
33  
34

35 The packages from the three supermarkets in each capital were labelled and photographed, the  
36 package was opened, and two identical 50- to 100-gram samples of the food were placed in  
37 appropriately labelled plastic bags. All the empty packages were stored, as were the receipts from  
38 the purchases. The name of the product, producer, country of origin, “best before” date, and the  
39 languages used in the list of ingredients were recorded.  
40  
41  
42  
43  
44  
45

46 Between May 2012 and September 2013, 454 packages were purchased in 60 supermarkets in the  
47 capitals of Albania, Austria, Bosnia-Herzegovina, Bulgaria, Croatia, Denmark, France, Germany,  
48 Hungary, The Former Yugoslav republic of Macedonia, Montenegro, Poland, Norway, Romania,  
49 Serbia, Slovakia, Sweden, the Czech Republic, and the United Kingdom. In addition, 30 packages  
50 were bought in three large supermarkets in Malmö, the third largest city in Sweden.  
51  
52  
53  
54  
55  
56  
57  
58  
59  
60



### **Purchase of biscuits/cakes/wafers in ethnic shops**

Because our analysis of the biscuits/cakes/wafers from supermarkets in the Balkan capitals yielded a relatively high number of foods with high amounts of I-TF, we decided to search for these types of Balkan foods in other countries using Google (search term: name of capital and “Balkan foods”) to identify ethnic shops selling Balkan foods. Three different shops were visited in Berlin, Copenhagen, London, Oslo, and Paris and in addition in Malmö. A total of 114 pre-packaged biscuits/cakes/wafers were purchased in these shops using the same inclusion criteria and sampling procedure as were used for the purchases in supermarkets.

### **Analysis of TF**

The foods were homogenised, and the fatty acid content was analysed using gas chromatography on a 60-metre highly polar capillary column using a modification of the AOAC 006-06 method. The analytical work was conducted by Microbac Laboratories, Warrendale, Pennsylvania, US, an ISO-17025-certified laboratory.

### **Results**

#### *I-TFA content in pre-packaged biscuits / cakes / wafers*

The I-TF content in the 312 products bought in the three supermarkets in each country was ranked according to I-TF level expressed in grams per 100 grams of the product (figure 1). Each bar in each panel represents a product. Only products with more than 2% of the fat content as TF are shown. The first number given in the panel is the number of products with more than 2% of the fat content as TF. The number in parentheses is the number of products that fulfilled the inclusion criteria. The difference between the two numbers reflects the number of samples that did not

1  
2  
3  
4 contain appreciable amounts of TF despite the information on the label. The panels are ranked  
5  
6 according to the sum of I-TF concentrations in the different products.  
7

#### 8 9 *Dissemination across countries*

10 The highest amount was found in Bosnia Herzegovina, followed by Serbia. Of the 312 products  
11  
12 made by 51 food producers in 15 European countries, 40% of the products had more than 20% of  
13  
14 the fat as I-TF with a mean(SD) of 32(7) %. We found 212 different products with more than 2 %  
15  
16 I-TFA in the fat. Only 10 food producers provided together 110 of the products i.e. about 50%. One  
17  
18 producer provided 30 different products. In the supermarkets in the capitals of Austria, Denmark,  
19  
20 France, Germany, Norway, Sweden, and the UK, no samples were found that fulfilled the inclusion  
21  
22 criteria (figure 1, lower right panel). The panel for three supermarkets in Malmö, Sweden was  
23  
24 similar to the panels for Podgorica, Montenegro, Skopje and The Former Yugoslav republic of  
25  
26 Macedonia, and was very different from the zero values found in the supermarkets in Copenhagen,  
27  
28 Oslo, and Stockholm.  
29  
30  
31

#### 32 33 *Ethnic shops*

34  
35 A total of 83 packages of biscuits/cakes/wafers with high amounts of TF were bought in the ethnic  
36  
37 shops in five capitals and in Malmö; this number varied between nine and 20 for each shop (figure  
38  
39 2). Furthermore, 60% of the products had more than 20% of the fat as I-TF with a mean(SD) of  
40  
41 30(9) %. Many of the products were the same in the six countries. These foods were also found in  
42  
43 Copenhagen, which is surprising because their sale is illegal in Denmark, in contrast to the other  
44  
45 countries in which the foods were found.  
46  
47

#### 48 49 *Comparison between 2006 and 2013*

50 In Poland, Bulgaria, and Romania, there were no obvious changes in the presence of many products  
51  
52 with high I-TF between 2006 and 2013 (figure 3). The products in these countries were primarily  
53  
54  
55  
56  
57  
58  
59  
60

1  
2  
3  
4 from local food producers. Hungary and, especially, the Czech Republic showed a decline in high-I-  
5  
6 TF foods during the same period.  
7  
8  
9

## 10 **Discussion**

### 11 **Products with industrial *trans* fat in supermarkets**

12  
13 In each of 20 European capitals, three large supermarkets were visited in 2012-13, and in five of the  
14  
15 capitals and in Malmö, Sweden, an additional three ethnic shops were visited. A total of 598  
16  
17 packages containing biscuits/cakes/wafers were bought and analysed for TF content, and 396 of  
18  
19 these products contained high amounts of I-TF (more than 2 grams per 100 grams of fat). In 25  
20  
21 different products, the I-TF content was higher than 40 grams per 100 grams of fat. Similarly high  
22  
23 values of I-TF in foods bought in Poland and in Serbia have also been reported in Polish and  
24  
25 Serbian studies.<sup>22,23</sup> The findings clearly demonstrate that I-TF is still present in 2013 in high  
26  
27 concentrations in popular foods in many countries in Europe (figures 1 and 2).  
28  
29  
30

31  
32 Some foods with partially hydrogenated fat or a similar term in the list of ingredients did not  
33  
34 contain significant amounts of TF based on a chemical analysis. A mixture of *cis* unsaturated fat  
35  
36 and fully hydrogenated fat without TF is understood by some food producers to be partially  
37  
38 hydrogenated fat.  
39  
40

41  
42 In all 20 countries except for Denmark and Austria, it is legal to use as much I-TF in foods as  
43  
44 technically possible without providing the quantity on the list of ingredients. Governments and  
45  
46 consumer associations strive to follow the recommendations of the WHO. The voluntary reduction  
47  
48 in the amount of I-TF in foods by food producers appears to work well in some countries, but not in  
49  
50 others. Food producers in a given country or in neighbouring countries may remove I-TF from their  
51  
52 products, but importing products with high I-TF content from more distant countries may  
53  
54 counteract the initiatives, as demonstrated in the supermarkets in southern Sweden (figure 1, panel  
55  
56  
57  
58  
59  
60

1  
2  
3  
4 4). Based on previous measurements, the I-TF content in biscuits/cakes/wafers from supermarkets  
5  
6 in Germany, France, and the UK was nearly eliminated between 2005 and 2009,<sup>19</sup> and no products  
7  
8 with significant amounts of TF were found in 2013 (figure 1). This result contrasts with the  
9  
10 situation in Poland, Bulgaria, and Romania, where there were no obvious changes in the presence of  
11  
12 I-TF in foods between 2006 and 2013 (figure 3). The products in these countries were primarily  
13  
14 from local food producers. Hungary and, especially, the Czech Republic showed a decline in high-I-  
15  
16 TF foods during the same period.  
17  
18  
19  
20  
21

### 22 **Products with industrial *trans* fat in ethnic shops**

23  
24 Although the number of consumers who regularly buy food in ethnic shops may be lower than the  
25  
26 number of consumers who purchase food in large supermarkets, the harmful effect of I-TF is still  
27  
28 present. Studies from Sweden suggest that mortality due to heart disease among immigrants exceeds  
29  
30 the mortality rate in the indigenous population<sup>24-26</sup>. Using the same Internet procedure that was  
31  
32 used to identify shops with Balkan foods in other countries, three ethnic shops where pre-packaged  
33  
34 biscuits/cakes/wafers with high amounts I-TF were available were found in Copenhagen. These  
35  
36 sales are illegal and can be stopped immediately by the food authorities, if they desire.<sup>27</sup>  
37  
38  
39

40 In Southern Sweden, biscuits/cakes/wafers with high amounts of I-TF are present not only in small  
41  
42 ethnic shops (figure 2) but also in large supermarkets (figure 1). This type of product has spread  
43  
44 from the small ethnic shops to large supermarkets, suggesting considerable sales of these products,  
45  
46 which remain legal in Sweden. The Swedish parliament decided in 2011 that Sweden should adopt  
47  
48 the same I-TF legislation as Denmark, but the Swedish government decided to postpone the  
49  
50 implementation on the advice of the Swedish food authorities because they found that all of the  
51  
52 large food suppliers in Sweden, Norway, and Denmark had removed I-TF from products sold in  
53  
54 Sweden.<sup>13</sup> They did not take into account the free flow of goods across borders in Europe. Many  
55  
56  
57  
58  
59  
60

1  
2  
3  
4 products with high amounts of I-TF have ingredient lists in more than 10 different languages,  
5  
6 suggesting that they are potentially exported to many different countries. Retailers distributing these  
7  
8 foods are present in Sweden and in other European countries, and the majority of products with  
9  
10 high amounts of I-TF can be bought on the Internet, which is legal for private consumption only.  
11  
12 Although foods with high amounts of I-TF were not found in large supermarkets in other Western  
13  
14 countries, the Swedish story may repeat elsewhere.

15  
16  
17 The strength of this study is that it provides up-to-date data about the availability of popular foods  
18  
19 containing high amounts of I-TF in 20 European countries. One weakness of the study is that the  
20  
21 average daily intake of I-TF was not measured in subgroups of the population in the various  
22  
23 countries but instead was inferred from the presence of biscuits/cakes/wafers with high amounts of  
24  
25 I-TF in large supermarkets. The following assumptions led to the conclusion that these products  
26  
27 have harmful effects: 1) the analysed brands of biscuits/cakes/wafers were stocked at the  
28  
29 supermarkets because they are sold in considerable amounts; 2) the majority of these foods are  
30  
31 regularly bought and consumed by the same subgroups of consumers; and 3) the findings in the  
32  
33 supermarkets in each capital are representative of the country. In addition, it is likely that the  
34  
35 presence of I-TF in biscuits/cakes/wafers is a marker of a more widespread use of I-TF in other  
36  
37 foods, including products that are not sold in pre-packaged form suggesting a higher intake of I-TF  
38  
39 than that from biscuits/cakes/wafers. Another weakness of the study is that the foods were only  
40  
41 bought in large supermarkets or in small ethnic shops with foods from the Balkans. The I-TF  
42  
43 content in other foods sold by small, privately owned shops or street vendors was not examined.  
44  
45 High amounts of I-TF prolong the shelf life of foods, and it is reasonable to assume that this factor  
46  
47 is even more important for small shops than it is for larger supermarkets. The selective pattern of  
48  
49 purchasing in the present study may thus have led to an underestimation of the amounts of I-TF  
50  
51 consumed by subgroups of the population, such as truck and taxi drivers, manual labourers, and  
52  
53  
54  
55  
56  
57  
58  
59  
60

1  
2  
3  
4 members of minority ethnic groups, who already have an increased risk of coronary heart disease  
5  
6 partly because of lifestyle factors such as smoking, poor diet, and metabolic syndrome.<sup>28</sup>  
7  
8  
9

### 10 **A legislative limit of industrial *trans* fat in foods or a voluntary reduction?**

11  
12 EU countries, with the exceptions of Austria and Denmark, legally allow foods with a high amount  
13  
14 of I-TF as a percentage of the total fat content (up to 60%) to be sold without notice as long as the  
15  
16 food is unpackaged, as it is in restaurants and fast food outlets. If the food is pre-packaged, the law  
17  
18 requires the presence of I-TF to be noted only by the term “partially hydrogenated fat” on the list of  
19  
20 ingredients. Most consumers do not recognise the hazard concealed therein and will have  
21  
22 difficulties in, or not attempt to decipher the often illegible text in the list of ingredients.<sup>29-31</sup>  
23  
24

25  
26 Societal pressure on food producers has undoubtedly resulted in a reduction in the population-level  
27  
28 mean intake of I-TF from 2005 to 2013, especially in Western EU countries<sup>19</sup>, but high intake of I-  
29  
30 TF is still possible in Eastern Europe and South-eastern European countries, with no obvious  
31  
32 downward trend in the availability of these foods from 2006 to 2013 in three of the countries (figure  
33  
34 3). High intake of I-TF in subgroups will continue as long as popular foods with a high  
35  
36 concentration of I-TF are available. Although labelling foods with I-TF content may further reduce  
37  
38 the mean intake of I-TF, such labelling still allows for the intake of high amounts because fast food  
39  
40 in restaurants is not labelled and because consumers might not pay attention to or understand the  
41  
42 labels.<sup>31</sup> An important advantage of a legislative limit on the I-TF content of food is that it does not  
43  
44 require that the population learn about the health risks of I-TF or pay attention to the labels of food  
45  
46 products. Furthermore, it is simpler and less expensive to monitor the presence of I-TF in foods at  
47  
48 the sales level than to monitor the actual intake of I-TF at the individual level in at-risk subgroups  
49  
50 of the population.  
51  
52  
53  
54  
55  
56  
57  
58  
59  
60

1  
2  
3  
4 Because many of the biscuits/cakes/wafers in the supermarkets that were visited did not contain I-  
5 TF, a legislative I-TF limit would not affect the supply of these foods and would most likely  
6  
7  
8 moderately affect the production of most food producers. It has been shown that I-TF in cakes,  
9  
10 cookies and micro wave popcorn can be replaced by a mixture of saturated, monounsaturated, and  
11  
12 polyunsaturated fat, which is a healthier fat composition than a one-to-one substitution of I-TF with  
13  
14 saturated fat.<sup>32</sup> A reduction in I-TF content without a commensurate increase in saturated fats was  
15  
16 found in fast food purchases in New York City's restaurants after legislative restriction of I-TF in  
17  
18 restaurants.<sup>33</sup> The regulations in Austria, Denmark, Switzerland, and Iceland have shown that the  
19  
20 health risks of high intake of I-TF can be eliminated for the entire population without any noticeable  
21  
22 side effects for consumers. The extent to which the difference in the presence of I-TF in popular  
23  
24 foods in Eastern and Western Europe contributes to the much higher mortality from coronary heart  
25  
26 disease in Eastern Europe than in Western Europe remains to be determined.<sup>34</sup> It also needs to be  
27  
28 determined to which extent the approximate 70% reduction (the highest reduction in the European  
29  
30 Union from 1980 to 2009) in coronary mortality among Danish males and females is actually due  
31  
32 to a minimal intake of I-TF in all subgroups in Denmark during the latter part of this period.<sup>34</sup>  
33  
34  
35 The effectiveness of policies for reducing dietary TF was recently assessed based on studies  
36  
37 published between 2005 and 2012.<sup>17</sup> It was found that "bans were most effective in eliminating TF  
38  
39 from the food supply, whereas mandatory TF labelling and voluntary TF limits had a varying  
40  
41 degree of success". This statement is strongly supported by the findings in the present study  
42  
43 concerning the current availability of popular foods with high amounts of I-TF in Europe, thus  
44  
45 lending support for a legislative *trans* fat restriction by the EU. This is a low hanging fruit to pick in  
46  
47 the prevention of coronary heart disease among 500 million EU citizens.  
48  
49  
50  
51  
52  
53  
54  
55  
56  
57  
58  
59  
60

1  
2  
3  
4  
5  
6  
7  
8  
9  
10  
11  
12  
13  
14  
15  
16  
17  
18  
19  
20  
21  
22  
23  
24  
25  
26  
27  
28  
29  
30  
31  
32  
33  
34  
35  
36  
37  
38  
39  
40  
41  
42  
43  
44  
45  
46  
47  
48  
49  
50  
51  
52  
53  
54  
55  
56  
57  
58  
59  
60

-----

**Contributors:**

SS and JD were both responsible for the concept design of the study, for collection of food items, registration and labelling. SS and JD produced the first draft of the study and SS, JD and AA were responsible for critical revision of the manuscript. SS is the manuscripts guarantor.

**Competing interest:**

No competing interests

"All authors have completed the ICMJE uniform disclosure form at [www.icmje.org/coi\\_disclosure.pdf](http://www.icmje.org/coi_disclosure.pdf) and declare: no support from any organization for the submitted work; no financial relationships with any organizations that might have an interest in the submitted work in the previous three years; no other relationships or activities that could appear to have influenced the submitted work."

**Ethics committee:**

The study does not require an approval from the Ethics committee

**Acknowledgements:**



1  
2  
3  
4 We acknowledge the support from Jenny Vissings Foundation, University of Copenhagen and the  
5  
6 Department of Clinical Biochemistry, Gentofte University Hospital  
7  
8  
9

10  
11 **Role of the funding source:**

12 The sponsor of the study had no role in the study design, data collection, analysis, and  
13 interpretation, the writing of the report, or the decision to submit the article for publication. The  
14  
15 corresponding author had full access to all of the data for the study and had final responsibility for  
16  
17 the decision to submit the manuscript for publication.  
18  
19  
20  
21  
22  
23

24 **Copyright statement:**

25 The Corresponding Author has the right to grant on behalf of all authors and does grant on behalf of  
26  
27 all authors, a worldwide licence to the Publishers and its licensees in perpetuity, in all forms,  
28  
29 formats and media (whether known now or created in the future), to i) publish, reproduce,  
30  
31 distribute, display and store the Contribution, ii) translate the Contribution into other languages,  
32  
33 create adaptations, reprints, include within collections and create summaries, extracts and/or,  
34  
35 abstracts of the Contribution, iii) create any other derivative work(s) based on the Contribution, iv)  
36  
37 to exploit all subsidiary rights in the Contribution, v) the inclusion of electronic links from the  
38  
39 Contribution to third party material where-ever it may be located; and, vi) licence any third party to  
40  
41 do any or all of the above.”  
42  
43  
44  
45  
46  
47  
48

49 **Transparency declaration:**

50 Steen Stender (the manuscript's guarantor) affirms that the manuscript is an honest, accurate, and  
51  
52 transparent account of the study being reported; that no important aspects of the study have been  
53  
54  
55  
56  
57  
58  
59  
60

1  
2  
3  
4 omitted; and that any discrepancies from the study as planned (and, if relevant, registered) have  
5  
6 been explained  
7  
8  
9

#### 10 11 **Data sharing statements:**

12 The data used to construct figure 1-3 can be shared by emailing Steen Stender  
13  
14  
15  
16  
17  
18  
19  
20  
21  
22  
23

#### 24 **References**

- 25  
26 1 Wahle KWJ, James WPT. Isomeric fatty acids and human health. *Eur J Clin Nutr* 1993; 47:  
27 828–39.  
28  
29  
30 2 Mozaffarian D, Katan MB, Ascherio A, et al. *Trans* fatty acids and cardiovascular  
31 disease. *N Engl J Med* 2006; 354: 601–3.  
32  
33  
34 3 Kiage JN, Merrill PD, Robinson CJ, et al. Intake of trans fat and all-cause mortality in the  
35 Reasons for geographical and Racial Differences in Stroke (REGARDS) cohort. *Am J Clin*  
36 *Nutr* 2013; 97: 1121–8  
37  
38  
39 4 Brouwer IA, Wanders AJ, Katan MB. *Trans* fatty acids and cardiovascular health: research  
40 completed? *Eur J Clin Nutr* 2013; 67: 1–7  
41  
42  
43 5 Decsi T and Boehm G. *trans* Isomeric fatty acids are inversely related to the availability of  
44 long-chain PUFAs in the perinatal period. *Am J Clin Nutr* 2013; 98(suppl): 543S–8S  
45  
46  
47  
48 6 Richardson AJ1, Montgomery P. The Oxford-Durham study: a randomized, controlled trial of  
49 dietary supplementation with fatty acids in children with developmental coordination disorder.  
50  
51  
52  
53  
54  
55  
56  
57  
58  
59  
60  
*Pediatrics*. 2005 May;115(5):1360-6

- 1  
2  
3  
4 7 Richardson AJ1, Burton JR, Sewell RP, et al.  
5  
6 Docosahexaenoic acid for reading, cognition and behavior in children aged 7-9 years: a  
7  
8 randomized, controlled trial (the DOLAB Study). *PLoS One*. 2012;7(9):e43909.  
9  
10  
11 8 Uauy R, Aro A, Clarke R, et al. WHO Scientific Update on trans fatty acids: summary and  
12  
13 conclusions. *Eur J Clin Nutr*. 2009;63: 68S–75S  
14  
15 9 Dietary Guidelines for Americans 2010.  
16  
17 [www.health.gov/dietaryguidelines/dga2010/DietaryGuidelines2010.pdf](http://www.health.gov/dietaryguidelines/dga2010/DietaryGuidelines2010.pdf)  
18  
19 (Accessed April, 2014)  
20  
21  
22 10 Nordic Nutrition Recommendations 2012  
23  
24 [http://www.norden.org/en/theme/nordic-nutrition-recommendation/nordic-nutrition-](http://www.norden.org/en/theme/nordic-nutrition-recommendation/nordic-nutrition-recommendations-2012)  
25  
26 [recommendations-2012](http://www.norden.org/en/theme/nordic-nutrition-recommendation/nordic-nutrition-recommendations-2012)(Accessed April, 2014)  
27  
28  
29 11 Stop Press: Commission drops Danish trans fat case. *EU Food Law Weekly* 2007; 295 (23  
30  
31 March).  
32  
33 12 US FDA  
34  
35 [http://www.nytimes.com/2013/11/08/health/fda-trans-fats.html?hp&\\_r=1&](http://www.nytimes.com/2013/11/08/health/fda-trans-fats.html?hp&_r=1&)  
36  
37 (Accessed April 2014)  
38  
39  
40 13 Sveriges Riksdag  
41  
42 <http://www.riksdagen.se/sv/Debatter-->  
43  
44 [beslut/Interpellationsdebatter1/Debatt/?did=H010498&doctype=ip#pos=865](http://www.riksdagen.se/sv/Debatter--beslut/Interpellationsdebatter1/Debatt/?did=H010498&doctype=ip#pos=865) (Accessed April  
45  
46 2014)  
47  
48  
49  
50  
51  
52  
53 14 Hungary  
54  
55  
56  
57  
58  
59  
60

- 1  
2  
3  
4 [http://www.eurofoodlaw.com/country-reports/eu-member-states/hungary/hungary-to-limit-](http://www.eurofoodlaw.com/country-reports/eu-member-states/hungary/hungary-to-limit-transfats-track-consumption-69040.htm)  
5 [transfats-track-consumption-69040.htm](http://www.eurofoodlaw.com/country-reports/eu-member-states/hungary/hungary-to-limit-transfats-track-consumption-69040.htm) (Accessed April, 2014)  
6  
7  
8  
9  
10  
11  
12  
13  
14  
15  
16  
17  
18  
19  
20  
21  
22  
23  
24  
25  
26  
27  
28  
29  
30  
31  
32  
33  
34  
35  
36  
37  
38  
39  
40  
41  
42  
43  
44  
45  
46  
47  
48  
49  
50  
51  
52  
53  
54  
55  
56  
57  
58  
59  
60
- 15 Norwegian Government  
<http://lovdata.no/dokument/LTI/forskrift/2014-01-16-34> (Accessed April, 2014)
- 16 Hooker N and Downs MS. Trans-Border Reformulation: US and Canadian Experiences with  
*trans* Fat. *International Food and Agribusiness Management Review*. 2014 Volume 17  
Special Issue A, 131-46.
- 17 Downs MS, Thow AM, Leeder SR. The effectiveness of policies for reducing dietary trans fat:  
a systematic review of the evidence. *Bull World Health Organ*. 2013; 91: 262–269H.
- 18 Stender S, Dyerberg J, Bysted A, et al. A *trans* world journey. *Atheroscler* 2006; (Suppl 7):  
P47–52.
- 19 Stender S, Astrup A, Dyerberg J. A *trans* European Union difference in the decline in *trans*  
fatty acids in popular foods: a market basket investigation. *BMJ Open* 2012; 2:e000859.
- 20 Regulation (EU) No 1169/2011 of the European Parliament and of the Council of 25 October  
2011 L 304/35  
<http://eur-lex.europa.eu/LexUriServ/LexUriServ.do?uri=OJ:L:2011:304:0018:0063:EN:PDF>  
(Accessed April 2014)
- 21 NHS Choices  
<http://www.nhs.uk/Livewell/Goodfood/Pages/Fat.aspx> (Accessed April 2014)
- 22 Zbikowska A, Krygier K. Changes in the Fatty Acids Composition, Especially *Trans* isomers,  
and Heat Stability of Selected Frying Fats Available on the Polish Market in the Years 1997  
and 2008. *Pol. J. Food Nutr. Sci*. 2011; 61 (1): 45–9.
- 23 Kravic SZ, Suturovic ZJ, Svarc-Gajic JV, et al.

- 1  
2  
3  
4 Fatty acid composition including trans-isomers of Serbian biscuits. *Hem. Ind*; 2011; 65 (2)  
5  
6 139–46.  
7  
8  
9 24 Gadd M, Johansson SE, Sundquist J, et al. Morbidity in cardiovascular diseases in  
10 immigrants in Sweden. *J Intern Med*. 2003; 254 (3):236-43.  
11  
12  
13 25 Gadd M1, Johansson SE, Sundquist J, et al. The trend of cardiovascular disease in  
14 immigrants in Sweden *Eur J Epidemiol*. 2005; 20 (9):755-60.  
15  
16  
17 26 Sundquist K1, Li X. Coronary heart disease risks in first- and second-generation immigrants  
18 in Sweden: a follow-up study. *J Intern Med*. 2006; 259 (4):418-27.  
19  
20  
21 27 Danish trans fat legislation  
22  
23 <http://www.foedevarestyrelsen.dk/english/food/trans%20fatty%20acids/Pages/default.aspx>  
24  
25  
26 (Accessed April, 2014)  
27  
28 28 Gill PE and Wijk K. Case study of a healthy eating intervention for Swedish lorry drivers.  
29  
30 *Health Education Research*. 2004; 19(3): 306–15.  
31  
32  
33 29 Consumers find food labelling confusing.  
34  
35 <http://www.guardian.co.uk/money/2009/may/07/food-drink-health-labels>  
36  
37 (Accessed April 2014)  
38  
39 30 Borra S. Consumer perspectives on food labels. *Am J Clin Nutr*; 2006; 83(5): 1235S.  
40  
41 31 Jasti S and Kovacs S. Use of Trans fat Information on Food Labels and Its Determinants in a  
42 Multiethnic College Student Population. *Journal of Nutrition Education and Behavior*. 2010;  
43  
44 42: 307–14.  
45  
46  
47  
48 32 Stender S, Astrup P, Dyerberg J. What Went In When Trans Went Out? *N Engl J Med* 2009;  
49  
50 361: 314–16.  
51  
52  
53  
54  
55  
56  
57  
58  
59  
60

- 1  
2  
3  
4 33 Angell SY, Cobb LK, Curtis CJ, et al. Change in Trans fatty Acid Content of Fast-Food  
5 Purchases Associated with New York City's Restaurant Regulation. *Ann Intern Med* 2012;  
6 157: 81-86.  
7  
8  
9  
10 34 Nichols M, Townsend N, Scarborough P, et al. Trends in age-specific coronary heart disease  
11 mortality in the European Union over three decades:1980-2009. *Eur Heart J* 2013; 34(39):  
12 3017-27.  
13  
14  
15  
16  
17  
18  
19  
20  
21  
22  
23  
24  
25  
26  
27  
28  
29  
30  
31

## Legends

### Figure 1

32  
33  
34  
35  
36  
37 Amounts of industrially produced artificial *trans* fat (I-TF) in 100 grams of pre-packaged  
38 biscuits/cakes/wafers with more than 2% I-TF of the total fat content, bought in three supermarkets  
39 in each of 20 European capitals and in Malmö, Sweden in 2012-2013. Each bar in a panel  
40 represents a product. N is the number of products. The number in parentheses is the number of  
41 foods that fulfilled the inclusion criteria.  
42  
43  
44  
45  
46  
47

48  $\bar{x}$  (SD) is the mean value of I-TF% of total fat in the products shown in the panel. FYROM (The  
49 Former Yugoslav Republic of Macedonia).No products fulfilled the inclusion criteria in  
50 supermarkets in London, Paris, Berlin, Vienna, Copenhagen, Oslo, and Stockholm.  
51  
52  
53  
54  
55  
56  
57  
58  
59  
60

**Figure 2**

Amounts of industrially produced artificial *trans* fat (I-TF) in 100 grams of pre-packaged biscuits/cakes/wafers with more than 2% I-TF of the total fat content bought in three ethnic shops in five European capitals in 2012-2013 and in Southern Sweden. Each bar in a panel represents a product. N is the number of products. The number in parentheses is the number of foods that fulfilled the inclusion criteria.  $\bar{x}$  (SD) is the mean value of I-TF% of total fat in the products shown in the panel.

**Figure 3**

Amounts of industrially produced artificial *trans* fat (I-TF) in 100 grams of pre-packaged biscuits/cakes/wafers with more than 2% I-TF of the total fat content bought in three supermarkets in each of five capitals in Eastern Europe in 2006 and 2013.  $\bar{x}$  (SD) is the mean value of I-TF% of total fat in the products shown in the panel.

Figure 1

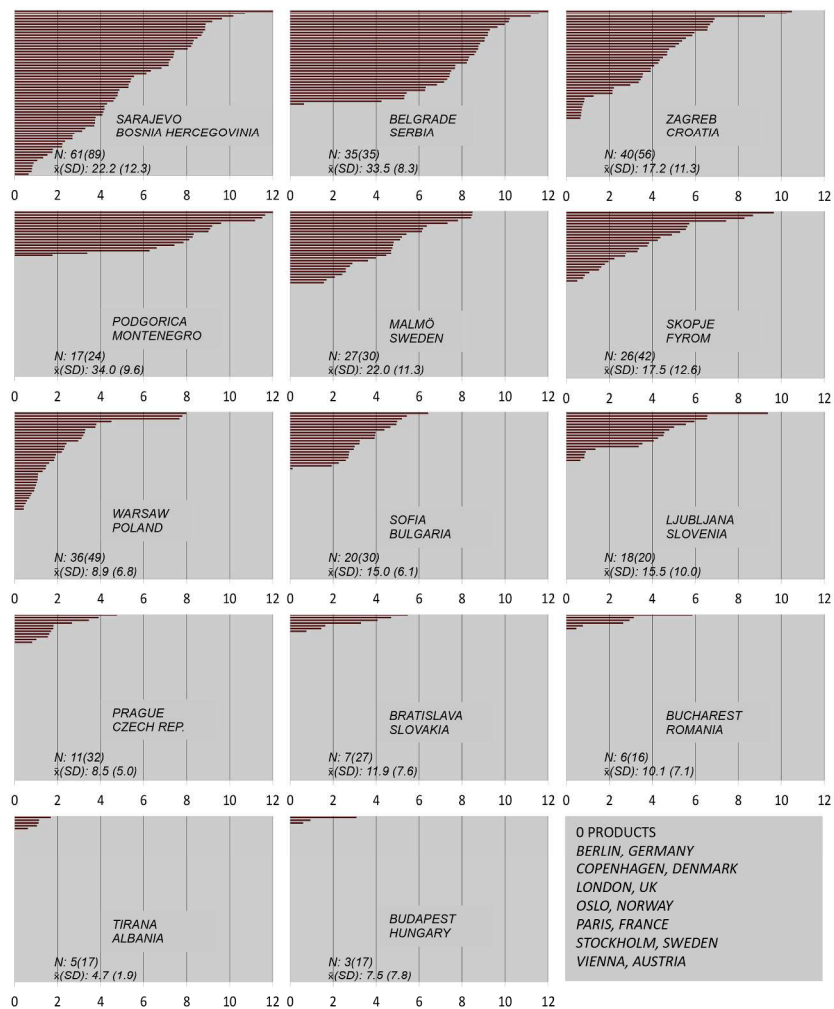

Gram I-TF per 100 gram product

190x275mm (300 x 300 DPI)



1  
2  
3  
4  
5  
6  
7  
8  
9  
10  
11  
12  
13  
14  
15  
16  
17  
18  
19  
20  
21  
22  
23  
24  
25  
26  
27  
28  
29  
30  
31  
32  
33  
34  
35  
36  
37  
38  
39  
40  
41  
42  
43  
44  
45  
46  
47  
48  
49  
50  
51  
52  
53  
54  
55  
56  
57  
58  
59  
60

Figure 2

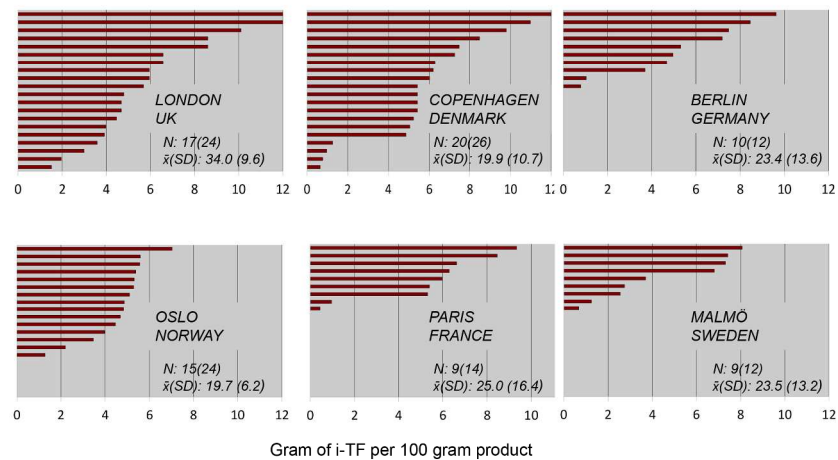

190x275mm (300 x 300 DPI)

FIGURE 3

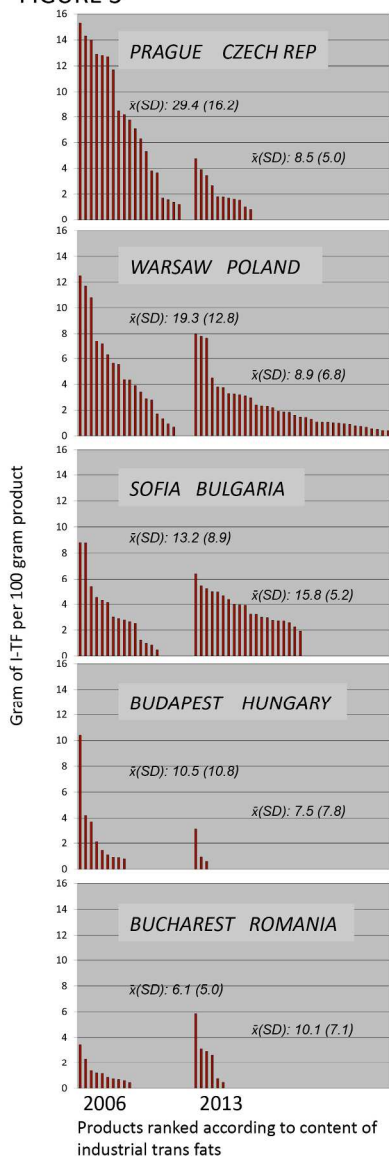

190x275mm (300 x 300 DPI)

## Industrial *trans* fat in popular foods is still a health issue in Europe: a market basket investigation

This paper is a rather special epidemiologic observational study: a market basket investigation. We have gone through the various 22 points in the STROBE checklist and have made sure that relevant points for this study are fulfilled. FOR EACH ITEM NO WE HAVE ADDED THE PAGE NUMBER IN CAPITALS FOR THE PAGES WITH THE APPROPRIATE SENTENCES

STROBE Statement—Checklist of items that should be included in reports of *cross-sectional studies*

|                           | Item No | Recommendation                                                                                                                                                                                                                                                                                                                                                                                                |
|---------------------------|---------|---------------------------------------------------------------------------------------------------------------------------------------------------------------------------------------------------------------------------------------------------------------------------------------------------------------------------------------------------------------------------------------------------------------|
| <b>Title and abstract</b> | 1       | (a) Indicate the study's design with a commonly used term in the title or the abstract PAGE 1 "market basket investigation"<br>(b) Provide in the abstract an informative and balanced summary of what was done and what was found PAGE 2                                                                                                                                                                     |
| <b>Introduction</b>       |         |                                                                                                                                                                                                                                                                                                                                                                                                               |
| Background/rationale      | 2       | Explain the scientific background and rationale for the investigation being reported PAGE 3                                                                                                                                                                                                                                                                                                                   |
| Objectives                | 3       | State specific objectives, including any prespecified hypotheses PAGE 4                                                                                                                                                                                                                                                                                                                                       |
| <b>Methods</b>            |         |                                                                                                                                                                                                                                                                                                                                                                                                               |
| Study design              | 4       | Present key elements of study design early in the paper PAGE 4-5                                                                                                                                                                                                                                                                                                                                              |
| Setting                   | 5       | Describe the setting, locations, and relevant dates, including periods of recruitment, exposure, follow-up, and data collection. PAGE 5                                                                                                                                                                                                                                                                       |
| Participants              | 6       | (a) Give the eligibility criteria, and the sources and methods of selection of participants HERE IT IS FOOD PRODUCTS DESCRIBED AT PAGE 5                                                                                                                                                                                                                                                                      |
| Variables                 | 7       | Clearly define all outcomes, exposures, predictors, potential confounders, and effect modifiers. Give diagnostic criteria, if applicable NOT APPLICABLE                                                                                                                                                                                                                                                       |
| Data sources/measurement  | 8*      | For each variable of interest, give sources of data and details of methods of assessment (measurement). Describe comparability of assessment methods if there is more than one group AMOUNTS OF TRANS FAT PAGE 6                                                                                                                                                                                              |
| Bias                      | 9       | Describe any efforts to address potential sources of bias ANALYTICAL BIAS IN TRANS FAT RESULTS WERE ADDRESSED BY CHOOSING AN ISO_CERTIFIED LABORATORY PAGE 6                                                                                                                                                                                                                                                  |
| Study size                | 10      | Explain how the study size was arrived at PAGE 4                                                                                                                                                                                                                                                                                                                                                              |
| Quantitative variables    | 11      | Explain how quantitative variables were handled in the analyses. If applicable, describe which groupings were chosen and why FIG1-3; PAGE 6-7                                                                                                                                                                                                                                                                 |
| Statistical methods       | 12      | (a) Describe all statistical methods, including those used to control for confounding NOT RELEVANT IN THIS PAPER<br>(b) Describe any methods used to examine subgroups and interactions NOT RELEVANT IN THIS PAPER<br>(c) Explain how missing data were addressed NOT RELEVANT IN THIS PAPER<br>(d) If applicable, describe analytical methods taking account of sampling strategy NOT RELEVANT IN THIS PAPER |

(e) Describe any sensitivity analyses NOT RELEVANT IN THIS PAPER

---

### Results

---

|                  |     |                                                                                                                                                                                                                                                                                                                                                                                                                                                                                                |
|------------------|-----|------------------------------------------------------------------------------------------------------------------------------------------------------------------------------------------------------------------------------------------------------------------------------------------------------------------------------------------------------------------------------------------------------------------------------------------------------------------------------------------------|
| Participants     | 13* | (a) Report numbers of individuals at each stage of study—eg numbers potentially eligible, examined for eligibility, confirmed eligible, included in the study, completing follow-up, and analysed FIGURE 1 AND 2<br>(b) Give reasons for non-participation at each stage NOT RELEVANT IN THIS PAPER<br>(c) Consider use of a flow diagram NOT RELEVANT IN THIS PAPER                                                                                                                           |
| Descriptive data | 14* | (a) Give characteristics of study participants (eg demographic, clinical, social) and information on exposures and potential confounders PRE-PACKAGED BISCUITS/CAKES/WAFERS PAGE 5<br>(b) Indicate number of participants with missing data for each variable of interest NOT RELEVANT IN THIS PAPER                                                                                                                                                                                           |
| Outcome data     | 15* | Report numbers of outcome events or summary measures FIGURE 1-3 AND “Of the 312 products made by 51 factories in 15 European countries, 40% of the products had more than 20% of the fat as I-TF” PAGE 6                                                                                                                                                                                                                                                                                       |
| Main results     | 16  | (a) Give unadjusted estimates and, if applicable, confounder-adjusted estimates and their precision (eg, 95% confidence interval). Make clear which confounders were adjusted for and why they were included NOT RELEVANT IN THIS PAPER<br>(b) Report category boundaries when continuous variables were categorized NOT RELEVANT IN THIS PAPER<br>(c) If relevant, consider translating estimates of relative risk into absolute risk for a meaningful time period NOT RELEVANT IN THIS PAPER |
| Other analyses   | 17  | Report other analyses done—eg analyses of subgroups and interactions, and sensitivity analyses NOT RELEVANT IN THIS PAPER                                                                                                                                                                                                                                                                                                                                                                      |

---

### Discussion

---

|                  |    |                                                                                                                                                                                    |
|------------------|----|------------------------------------------------------------------------------------------------------------------------------------------------------------------------------------|
| Key results      | 18 | Summarise key results with reference to study objectives PAGE 7                                                                                                                    |
| Limitations      | 19 | Discuss limitations of the study, taking into account sources of potential bias or imprecision. Discuss both direction and magnitude of any potential bias PAGE 9                  |
| Interpretation   | 20 | Give a cautious overall interpretation of results considering objectives, limitations, multiplicity of analyses, results from similar studies, and other relevant evidence PAGE 11 |
| Generalisability | 21 | Discuss the generalisability (external validity) of the study results PAGE 9                                                                                                       |

---

### Other information

---

|         |    |                                                                                                                                                                       |
|---------|----|-----------------------------------------------------------------------------------------------------------------------------------------------------------------------|
| Funding | 22 | Give the source of funding and the role of the funders for the present study and, if applicable, for the original study on which the present article is based PAGE 13 |
|---------|----|-----------------------------------------------------------------------------------------------------------------------------------------------------------------------|

---

\*Give information separately for exposed and unexposed groups.

**Note:** An Explanation and Elaboration article discusses each checklist item and gives methodological background and published examples of transparent reporting. The STROBE checklist is best used in conjunction with this article (freely available on the Web sites of PLoS Medicine at <http://www.plosmedicine.org/>, Annals of Internal Medicine at <http://www.annals.org/>, and Epidemiology at <http://www.epidem.com/>). Information on the STROBE Initiative is available at [www.strobe-statement.org](http://www.strobe-statement.org).
